## Review Article

# Metabolism in atherosclerotic plaques: immunoregulatory mechanisms in the arterial wall

 **Maria J. Forteza**<sup>1</sup> and  **Daniel F.J. Ketelhuth**<sup>1,2</sup>

<sup>1</sup>Cardiovascular Medicine Unit, Center for Molecular Medicine, Department of Medicine, Karolinska Institute, Karolinska University Hospital, Stockholm, Sweden; <sup>2</sup>Department of Cardiovascular and Renal Research, Institute of Molecular Medicine, University of Southern Denmark, Odense, Denmark

**Correspondence:** Maria J. Forteza ([maria.forteza.de.los.reyes@ki.se](mailto:maria.forteza.de.los.reyes@ki.se))

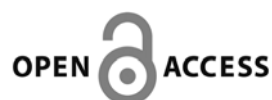

Over the last decade, there has been a growing interest to understand the link between metabolism and the immune response in the context of metabolic diseases but also beyond, giving then birth to a new field of research. Termed ‘immunometabolism’, this interdisciplinary field explores paradigms of both immunology and metabolism to provided unique insights into different disease pathogenic processes, and the identification of new potential therapeutic targets. Similar to other inflammatory conditions, the atherosclerotic inflammatory process in the artery has been associated with a local dysregulated metabolic response. Thus, recent studies show that metabolites are more than just fuels in their metabolic pathways, and they can act as modulators of vascular inflammation and atherosclerosis. In this review article, we describe the most common immunometabolic pathways characterised in innate and adaptive immune cells, and discuss how macrophages’ and T cells’ metabolism may influence phenotypic changes in the plaque. Moreover, we discuss the potential of targeting immunometabolism to prevent and treat cardiovascular diseases (CVDs).

## Introduction

Atherosclerosis is the main underlying cause of cardiovascular diseases (CVDs), such as myocardial infarction, stroke, and peripheral vascular disease, which lead to high mortality and morbidity worldwide [1]. Atherosclerosis is a multifactorial disorder linked to several other diseases and/or risk factors, including hyperlipidaemia, diabetes mellitus, hypertension, smoking, and sedentarism [2]. The atherosclerotic process starts very early in life, and fatty streaks, which are the first signs of disease, have been reported in human foetuses from hypercholesterolaemic mothers [3]. In most cases, atherosclerosis remains asymptomatic for decades. However, changes occur when significant reductions in blood flow caused by plaque growth and luminal stenosis or acute thrombotic obstruction induced by endothelial erosion or plaque rupture.

Currently, the foremost strategy to prevent atherosclerosis focuses on managing traditional risk factors, while the treatment of disease complications often relies on interventional and surgical procedures, such as percutaneous coronary intervention, stent implantation, and endarterectomy, all of which aim to re-establish blood flow. Despite recent progress, existing therapies are likely to reduce the incidence of heart disease by one-third at most [4]. In this dismal scenario, CVD remains a heavy burden on our society, and more than 17 million annual cardiovascular-related deaths are reported globally, which is approximately 31% of all-cause mortality [2]. Sadly, projections indicate that by 2030, nearly 24 million individuals will die of CVD yearly if disease care cannot be improved [5].

A large body of evidence points towards the immune system interacting with classic risk factors to drive vascular inflammation, which is the most important factor driving plaque formation and instability. In this context, there is high hope that lives can be saved with the use of immunoregulatory therapies [6,7]. Although human trials targeting inflammation in secondary prevention of CVD have been achieved, it is likely

Received: 17 November 2021  
 Revised: 02 March 2022  
 Accepted: 16 March 2022

Version of Record published:  
 29 March 2022

that a deeper understanding of the pathophysiological processes driven by immune cells in the arterial wall is still necessary for major breakthroughs. In this review, we summarise some recent developments in the field and discuss the role of immunometabolism in atherosclerotic plaques and its potential for modulating inflammation and improving cardiovascular medicine.

## The immune system and atherosclerosis: a brief overview

It is well recognised that atherosclerosis is a chronic inflammatory disease initiated by the retention and modification of low-density lipoprotein (LDL) in the intimal layer of large- and medium-sized arteries, which activates the endothelium and promotes immune cell infiltration [8]. Monocyte-derived and tissue-resident macrophages are the most common immune cell types found in growing plaques [9]. After dysregulated uptake of modified LDL [10], macrophages may become foam cells that are trapped in the vessel wall, eventually die and augment the local inflammatory process [11].

Primarily composed of smooth muscle cells (SMCs) and collagen, a fibrous cap is formed to stabilise the lesion and prevent prothrombotic molecules of the intima from contacting the bloodstream. However, the complex inflammatory process within the vascular wall can lead to high expression of matrix metalloproteinases (MMPs) and other mediators that can cause thinning and rupture of the plaque [12,13].

Not only macrophages but also T cells are abundant in plaques. The most common T-cell population, T helper (Th) 1 cells, has been proposed to accelerate disease, especially by secreting interferon  $\gamma$  (IFN $\gamma$ ), which acts in a proinflammatory and plaque-destabilising manner [6]. Hypercholesterolaemia has been associated with the expansion of distinct CD8<sup>+</sup> T-cell types that can also influence disease [14]. In addition to inhibiting SMC proliferation and reducing their capacity to produce collagen, IFN $\gamma$  can induce M1 macrophage polarisation, and the secretion of interleukin (IL) 1 $\beta$  (IL-1 $\beta$ ), IL-12, and TNF, all key players in atherogenesis. The milieu of cytokines produced by immune and vascular cells can induce high expression levels of the costimulatory molecules CD80 and CD86 and major histocompatibility complex (MHC) class II (MHC-II), which creates a proinflammatory feed-forward loop leading to increased Th1 responses [15–17].

Counteracting the proinflammatory responses in the vascular wall, M2 polarised macrophages and regulatory T cells (Tregs) are thought to strongly counteract disease [6,18]. M2 macrophages secrete IL-10 and resolving lipid mediators that can limit immune activation [19], increase efferocytosis, and promote the resolution of vascular inflammation [20,21]. Tregs further support the latter processes by different mechanisms, including the inhibition of type I responses, through the secretion of TGF $\beta$  and IL-10, and contact-dependent cell-mediated effects, such as mediating cytotoxic T lymphocyte-associated protein 4 (CTLA4) interactions with CD80/CD86 and promoting M2 macrophage polarisation [22].

Both innate and adaptive immune responses can influence all stages of atherosclerosis [23]. Data from animal models indicate that modulating immune cell repertoires and their secreted mediators in the arterial wall, such as by targeting specific immune cells, inhibiting/blocking cytokines and costimulatory molecules, and using different vaccine and tolerisation protocols, can prevent atherosclerotic CVD [7,24]. The successful reduction in the number of cardiovascular events and deaths demonstrated in recent clinical trials using anti-IL1 $\beta$  monoclonal antibodies [Canakinumab Anti-inflammatory Thrombosis Outcomes Study (CANTOS); ClinicalTrials.gov; NCT01327846] and colchicine [Low Dose Colchicine for secondary prevention of cardiovascular disease (LoDoCo2 Trial); UTN: U1111-1139-8608] strongly suggests that immunomodulation could be a relevant therapeutic option to combat atherosclerotic CVD in humans, in addition to the management of classic risk factors [25–27]. Despite that, canakinumab has not been approved by the FDA for treatment of atherosclerotic CVD, due to some of its side-effects, namely increased risk of severe infections and sepsis. Another trial (Cardiovascular Inflammation Reduction Trial—CIRT) attempting to use a broad-spectrum anti-inflammatory agent, methotrexate, to prevent CVD showed neutral results [28]. Collectively, these trials show that there is a need for further understanding of the specific inflammatory pathways governing atherosclerosis to achieve the goal of improving cardiovascular medicine.

## Immunometabolism: metabolic regulation of macrophage and T-cell responses

Metabolism and the induction of immune responses are very closely linked. In addition to fueling the most basic immune cell functions, such as the synthesis of immune mediators such as cytokines and chemokines and the formation of new cell membranes and allowing proliferation, microenvironmental or systemic abundance of different nutrients, and their metabolism, can modulate immune cell differentiation and polarisation, as well as their function, and result

in protective or deleterious responses. Thus, the growing field of immunometabolism research indicates that cellular metabolic pathways are not only housekeeping processes to maintain cell survival but also active modulators of disease processes that go beyond the spectrum of metabolic disorders, including cancer, infection, and autoimmune and autoinflammatory diseases [29]. In this section, we summarise major studies exploring the processes involved in the metabolic reprogramming of immune cells, especially the energy-related pathways, and the potential of targeting immunometabolism in macrophages and T cells to control inflammation.

Cellular metabolism to generate ATP involves a series of thermodynamically unfavourable reactions that, in addition to energy, can provide the building blocks needed for the synthesis of macromolecules. Energy metabolism is dynamically regulated in macrophages and can help these cells adapt to new functions. Glucose is the main source of ATP for most cell types, including macrophages and T cells. Once glucose crosses the plasma membrane and enters the cell, it is metabolised through two main metabolic pathways: glycolysis and the pentose phosphate pathway (PPP). Under normoxia, it is expected that glycolysis regulates the formation of pyruvate, which is then further metabolised through the TCA cycle in the mitochondria, involving a series of reactions called oxidative phosphorylation (OXPHOS), that generates 36 ATP molecules. In an anaerobic environment, it is expected that pyruvate metabolism will lead to increased lactate conversion and lower amounts but faster rates of ATP production (2 molecules).

In the 1920s, Otto Warburg observed that tumour cells have up-regulated glycolysis compared with surrounding normal tissue, with increased fermentation of pyruvate to lactate rather than oxidation in mitochondria, even in the presence of oxygen [30]. This peculiar form of energy metabolism, which is similar to anaerobic metabolism, has been termed ‘aerobic glycolysis’ and subsequently the ‘Warburg effect’. It has long been proposed that this characteristic metabolism may represent a selective adaptation associated with immune escape mechanisms of cancer cells. Recently, several groups demonstrated that immune challenge and leucocyte activation promote metabolic reprogramming that shifts metabolism from oxidative towards ‘Warburg metabolism’ [31,32]. Although aerobic glycolysis is a relatively inefficient way to generate ATP compared with OXPHOS, this method seems to be very important for quickly providing metabolic intermediates for key biosynthetic pathways that are needed during inflammation [33].

## The metabolic profiles of macrophages

In the steady state, quiescent M0 macrophages acquire energy by efficiently using the OXPHOS pathway [34]. In contrast, polarised macrophages (M1 and M2) seem to acquire metabolic characteristics of energy production that reflect distinct microenvironments [35]. At their extreme polarisation states, classical M1 macrophages, which can be induced by LPS and IFN $\gamma$ , and nonclassical M2 macrophages, which can be induced by IL-4 and IL-13, exhibit very distinct metabolic profiles [36]. It should be highlighted that the terms M1 and M2 are clear oversimplifications of a vast repertoire of possible phenotypes that can be generated *in vivo* [37], and develop within an inflamed tissue, including atherosclerosis. Recent studies employing single-cell RNA sequencing (scRNAseq) and Cytometry by time of flight (CyTOF) techniques to atherosclerotic plaque-derived cell suspensions have revealed at least five major macrophage clusters infiltrating the artery of mouse models (three major clusters termed ‘resident-like’, ‘inflammatory’, and ‘TREM2 foamy’ macrophages, and two less abundant clusters termed ‘IFN-inducible’ and ‘cavity macrophages’), which were to some extent similar in human plaques [38–45]. Therefore, hereafter the terms M1 and M2 should be interpreted with certain degree of caution, or just as a general reference to pro- and anti-inflammatory phenotypes, respectively.

Downstream of Toll-like receptor 4 (TLR4) and IFN $\gamma$  receptor (IFNR), NF- $\kappa$ B and Akt signalling trigger key metabolic alterations in macrophages, including increased glucose uptake [46–48] and the activation of the transcription factor hypoxia-inducible factor-1 $\alpha$  (HIF1 $\alpha$ ), and increased glycolysis flow towards lactate formation due to up-regulation of the pyruvate dehydrogenase kinase 1 (PDK1) and lactate dehydrogenase A (LDHA) [49]. Notably, these changes are thought to be needed for M1 macrophages to effectively perform phagocytosis, produce reactive oxygen species (ROS), and secrete pro-inflammatory cytokines [50].

Parallel to glycolysis, in the cytosol, the PPP drives the generation of ribose-5-phosphate and nicotinamide adenine dinucleotide phosphate (NADPH). Ribose-5-phosphate is a precursor of nucleotides and amino acids, while NADPH is used by several enzymes in macrophages, including NADPH oxidase, which can influence the generation of ROS in macrophages [51].

Metabolic alterations in macrophages are not limited to glycolysis, and metabolite tracing experiments on M1 macrophages revealed that the TCA cycle is truncated, resulting in reduced succinate dehydrogenase (SDH) and isocitrate dehydrogenase (IDH) activities, consequently leading to intracellular overload of succinate and citrate, respectively [52]. Excess citrate shifting from the mitochondria to the cytosol increases acetyl-coenzyme A (CoA)

production, which influences fatty acid synthesis and can boost the acetylation of gene promoters encoding inflammatory cytokines and chemokines [53]. In this context, ATP-citrate lyase (ACLY), which catalyses the transformation of citrate into acetyl-CoA and oxaloacetate, is induced by TLR ligation and has been implicated in the regulation of IL-1 $\beta$ , CXCL1, IL-6 and IL-12 production [54]. Accumulated succinate in the cytosol can stabilise HIF1 $\alpha$ , independent of normoxic or hypoxic conditions, and influence the transcription of metabolic and inflammatory mediators [55]. Succinate can also influence inflammation through the succinylation of pyruvate kinase M2 (PKM2) and active signalling via G protein-coupled receptor-91 (GPR91); both mechanisms that have been associated with the regulation of IL-1 $\beta$  production [55,56].

In addition to glycolysis and the PPP, glucose can be metabolised via the hexosamine biosynthesis pathway (HBP), leading to the generation of uridine diphosphate N-acetylglucosamine (UDP-GlcNAc) [57]. Several studies have demonstrated that O-linked B-N-acetylglucosamine (O-GlcNAc) signalling promotes an inflammatory response in macrophages [58,59]. O-GlcNAcylation can affect the transduction and transcription of key proinflammatory proteins, including NF- $\kappa$ B, in macrophages [60]. However, in certain scenarios, such as during ischaemia and sepsis, O-GlcNAcylation could also confer anti-inflammatory properties on macrophages [61,62], indicating that further investigation is needed to fully understand the role of this pathway in immunity.

When glucose availability is limited, ATP may be generated through fatty acid oxidation (FAO). Macrophages are capable of taking up different forms of lipids, such as free fatty acids bound to albumin, as well as LDL, VLDL, HDL and modified lipoproteins, which are typically mediated through specific receptors, including scavenger receptors such as SRA and CD36 [63,64]. Intracellularly, free fatty acids reach the mitochondria, where FAO takes place, and lead to the production of acetyl-CoA, NADH and FADH<sub>2</sub>, which may enter the TCA cycle and the electron transport chain to produce ATP [65].

M2-polarised macrophages mainly promote anti-inflammatory responses and healing. In general, the metabolism of M2 macrophages is comparable with that of quiescent macrophages and is shifted towards OXPHOS and FAO [64]. This propensity of M2 macrophages to metabolise lipids is also associated with increased lipoprotein lipase (LPL) and CD36 expression, which facilitates the uptake and intracellular transport of fatty acids [66]. However, recent studies have suggested that metabolism in M2 macrophages could be more complex than expected, and it was shown that carnitine palmitoyl transferase 2 (CPT2), a gatekeeper of FAO, is dispensable for M2 macrophage polarisation [67], while glycolysis plays a key role in the early steps of M2 polarisation [68]. Of note, some of the discrepancies in the literature regarding the metabolic profiles of macrophages could be due to nonspecific effects of inhibitors, such as 2-deoxy-D-glucose (2-DG), which, despite being used as an inhibitor of glycolysis, can also influence OXPHOS [69].

Amino acids are also essential nutrients for the immune system. During inflammation, amino acid deficiency may result in impaired immune cell migration, proliferation, and effector functions. Thus, altered amino acid metabolism is likely to affect macrophage responses through the generation of bioactive catabolites that can act as signalling molecules on these cells [70].

Macrophages utilise glutamine at high rates and are dependent upon extracellular sources of this amino acid. Glutamine can feed the synthesis of other amino acids, nucleotides, and NADPH, and it constitutes a key energy source. Interestingly, macrophage glutaminolysis seems to depend on the extracellular abundance of this amino acid, which can affect proliferation and other critical macrophage functions, such as phagocytosis, RNA synthesis and IL-1 $\beta$  production [33,71]. Having high glutamine flux towards the TCA cycle is a major mechanism by which succinate synthesis is promoted in M1 macrophages.

Excess succinate may also be generated through the 'GABA shunt', in which glutamine is metabolised into glutamate, GABA, succinic semialdehyde and subsequently succinate, bypassing the TCA cycle [55]. As mentioned earlier, excess succinate production can substantially impact inflammatory and metabolic gene expression through the regulation of HIF1 $\alpha$ , potentiating inflammation [72]. Glutaminolysis has also been implicated in M2 polarisation through different mechanisms, such as contributing to the production of  $\alpha$ -ketoglutarate, which is essential for M2-mediated OXPHOS and FAO, driving epigenetic reprogramming of M2-specific genes [73], and competing with succinate to stabilise HIF1 $\alpha$  [74].

There is a large body of evidence that links tryptophan (Trp) metabolism through the kynurenine pathway with peripheral tolerance mechanisms. It has been shown that during inflammation, indoleamine 2,3-dioxygenase (IDO) 1 (IDO1), the first and rate-limiting step in the pathway, is overexpressed. IDO overexpression drives local depletion of Trp, as well as the production of bioactive metabolites, which, through the activation of the stress sensor general control nonderepressible 2 (GCN2) or interactions with specific receptors, can regulate cell division and skew cytokine production towards an anti-inflammatory phenotype [75]. IDO ablation, on the other hand, promotes a proinflammatory profile on immune cells [76–78].

It is widely recognised that arginine is a very important amino acid in CVDs, acting as the substrate for the formation of nitric oxide, which is a key signalling molecule that regulates vascular tone and blood pressure [79]. Hence, arginine has also been implicated in immunity, driving different macrophage phenotypes depending on which pathway the amino acid is engaged in. Under proinflammatory stimuli, such as LPS, TNF or IFN $\gamma$ , inducible nitric oxide synthase (iNOS) is overexpressed in macrophages, which in turn drives arginine metabolism towards the classic production of NO and citrulline. In macrophages, NO can prevent M1 to M2 repolarisation by interfering with the mitochondrial electron transport chain [80]. Instead of iNOS, M2 macrophages overexpress ARG1, which leads to the formation of urea and ornithine, which is then further metabolised to polyamines and proline. By modulating proline or NO production, ARG1-mediated arginine metabolism has been proposed to be an important mechanism regulating fibrosis and resistance to infection by intracellular mycobacteria [32].

## The metabolic profiles of T cells

A basic T-cell response involves rapid proliferation and the production of effector molecules. In the presence of cognate antigens that are presented by MHC molecules, T cells rapidly shift from a naïve to an activated state, which demands quick energy production through glycolysis [31]. The metabolic profile of activated T cells is characterized by a shift from OXPHOS, which is described as the central energy producing pathway of resting T cells [81]. Compared with macrophages, naïve T cells exhibit lower metabolic rates and low energy demands for their survival.

It has been shown that upon activation, the energy produced via OXPHOS is not sufficient for the new requirements of the T-cell. Activation raises not only energy needs but also the need for intermediate metabolic precursors that can be obtained through the up-regulation of glycolysis. In this context, activated T cells are characterised by increased uptake of glucose and the up-regulation of different glycolytic enzymes, which increase pyruvate and lactate production intracellularly [82]. Through regeneration of the redox cofactor NAD<sup>+</sup> and the maintenance of favourable AMP/ATP ratios, glycolysis ensures an abundance of metabolic intermediates for the synthesis of lipids, proteins, and nucleic acids and provides the means for maintaining a stable redox balance [83]. Notably, glycolysis can also directly regulate the secretion of cytokines, for example the enzyme glyceraldehyde 3-phosphate dehydrogenase (GAPDH) can bind to AU-rich elements within the 3' UTR of IFN $\gamma$  mRNA and influence its expression [84]. Glycolysis has also been linked to the protection of T cells against apoptosis in the context of limited glucose availability [85].

In addition to enhanced glycolysis, T-cell activation also triggers the PPP pathway. This pathway provides precursors for the synthesis of nucleotides and aromatic amino acids, as well as NADPH, which is involved in the maintenance of reduced glutathione and supports lipid synthesis [86,87]. Similar to what happens in macrophages, increased glycolysis can also lead to enhanced HBP, the generation of UDP-GlcNAc and post-translational modifications of essential proteins for T cells [88].

Although glucose is considered the most critical nutrient in T cells, experiments deleting glutamine transporters provided strong evidence that this amino acid may also be essential for T-cell activation [89,90]. In addition to its role as a building block for the TCA cycle, glutamine provides a substrate for UDP-GlcNAc synthesis in T cells [88]. It has been shown that at key stages of T-cell development and activation, glucose and glutamine metabolism occur through the HBP to support dynamics intracellular protein O-GlcNAcylation [88].

After activation, CD8<sup>+</sup> T cells proliferate and differentiate into cytotoxic effector cells, whereas CD4<sup>+</sup> T cells, depending on the microenvironmental context, can be differentiated into distinct effector T (Teff) cell lineages, including Th1, Th2, Th17, T follicular helper, or regulatory cells (Tregs) [91]. Compared with other Teff cells, Tregs exhibit a peculiar metabolic profile. It has been shown that activation of the mTORC pathway favours the differentiation of Teff cells and suppresses Treg generation [92]. Genetic ablation of the *mTOR* gene in T cells promotes Treg proliferation but not that of Th1, Th2, or Th17 cells [93]. In line with these data, it has been shown that rapamycin-mediated suppression of mTOR can stimulate the development of FoxP3<sup>+</sup> Tregs, even in the context of Th17-polarising conditions *in vitro* [94]. We now know that the metabolic profiles of Teff cells are preferentially glycolytic due to mTOR activation, while in Tregs, energy is generated mainly through FAO and OXPHOS [95]. Interestingly, whether mTORC1 or mTORC2 is selectively triggered has been associated with skewed Th1 or Th2 differentiation, respectively [96]. In the context of chronic infections and cancer, it has been shown that many energy metabolism genes become down-regulated in T cells due to exhaustion or anergy. Thus, it has been shown that the restriction of leucine or glucose during T-cell activation can lead to an anergic phenotype [97].

## Metabolic dysregulation in atherosclerosis

Metabolic disorders are a major concern in modern society, and diabetes and obesity are considered independent risk factors for CVD [98,99]. Metabolic syndrome (MetS), which is a term used to define the clustering of at least

three major CVD risk factors, has been associated with proinflammatory and prothrombotic states that increase cardiovascular risk beyond that of its individual components, especially in women [100].

Similar immune pathways associated with the acceleration of atherosclerotic plaque formation have been identified in other tissues, for example adipose tissue, the liver, and the pancreas, in the context of metabolic disorders, such as obesity- and MetS-related diseases. Thus, altered numbers and skewed polarisation of leucocytes have been observed in individuals exposed to metabolic disturbances [101].

Recent findings highlighted a substantial impact of MetS-related diseases on ‘nonmetabolic-related’ immune processes in these individuals, such as impaired host defence and immunity against tumours [102]. Notably, obesity has been negatively associated with increased rates of vaccine failure and infection complications [103], raising concern about strategies for the global fight against pandemics, such as COVID-19 [104].

Metabolic dysfunction induced by high-fat diet feeding has been shown to increase inflammation in different tissues, in addition to the aorta in animal models [105]. High-fat diet feeding can influence the immune system at very early stages and skew leucocyte progenitor ratios and myeloid and lymphoid cell development [106]. A growing number of studies indicate that the microenvironmental and cellular metabolism can shape the function and differentiation of immune cells [107]. In this context, activation, proliferation, migration, phagocytosis, and cytokine release can be regulated by intrinsic metabolism [108], which are intracellular metabolic alterations, and/or extrinsic metabolism, which is the availability of nutrients and signalling through specific metabolite-sensing receptors [109].

Recent studies have revealed a complex metabolic environment within atherosclerotic plaques [110,111]. Moreover, it has been suggested that unstable plaques exhibit increased glycolysis, elevated amino acid utilisation, and decreased FAO compared with stable plaques [110]. Considering that atherosclerotic plaques are very complex tissues composed of lipids (cholesterol, cholesteryl esters, and phospholipids), a broad range of inflammatory cells (especially monocytes/macrophages and lymphocytes), SMCs (contractile and transdifferentiated), and several fibrous elements, including connective tissue and extracellular matrix proteins (e.g., collagen, proteoglycans, and fibronectin elastic fibres), the metabolic traits of vascular and immune cells, as well as the accumulation of extracellular metabolites, could help explain different plaque phenotypes (Figure 1).

## Evidence of immunometabolic responses in the atherosclerotic plaque

### Glucose metabolism in macrophages and T cells in atherosclerosis

Early studies using 18-fluorodeoxyglucose (18FDG) positron emission tomography (PET) revealed that both human and mouse atherosclerotic plaques exhibit higher glucose uptake than healthy vessels [112]. Imaging studies showed that macrophages in plaques overexpress glycolytic enzymes and have increased metabolites derived from glycolysis and the PPP, such as citrate, fumarate and succinate, similar to what is observed in activated leucocytes [113].

Experimental research using *ApoE*<sup>−/−</sup> mice revealed that increased glucose uptake in atherosclerotic plaques was linked to a hypermetabolic state and increased *Glut1* expression in haematopoietic cells [114]. Bone marrow transplantation from *Glut1*-deficient mice into irradiated *ApoE*<sup>−/−</sup> mice showed that *Glut1* deficiency inhibited myelopoiesis, decreased glucose uptake in the plaque, and slowed atherosclerosis progression [114].

Several studies have provided evidence that CD4 T-cell fate can be modulated by both intrinsic and extrinsic metabolic alterations. Naïve T cells that enter the plaque can be activated and deleteriously or protectively influence atherogenesis [6]. In the absence of antigens, naïve T cells remain quiescent and maintain basal expression of *Glut1* and glucose uptake [115]. However, in the absence of sufficient glucose, T cells fail to proliferate, and they undergo apoptosis [116]. Interestingly, a recent study suggested that subsets of CD4 T cells from atherosclerotic mice exhibited impaired glucose metabolism, as evidenced by decreases in *Glut1* expression and FAO oxidation-related genes [117]. It has also been suggested that T-cell receptor signalling in T cells in the lipid-rich atherosclerotic plaque environment can modulate T-cell metabolism and induce functional changes that lead to activation, proliferation and exhaustion [117].

In human atherosclerosis, glycolytic regulation of macrophage function seems to be crucial. Previous research has shown that monocytes and macrophages from patients with atherosclerosis exhibit increased glycolytic flux [118]. This increased glycolysis promotes PKM2 dimerisation and nuclear translocation, leading to increases in IL-6 and IL-1β expression. Inhibition of glycolysis or the induction of PKM2 tetramerisation corrects the proinflammatory phenotype of macrophages from patients with coronary artery disease [118]. Additional *ex vivo* studies with human atherosclerotic plaques have shown that oxidised LDL (oxLDL) and hypoxia increase glycolysis and promote a proinflammatory phenotype in macrophages [119,120]. Thus, increased glucose uptake in atherosclerotic plaques could be a consequence of macrophage adaptation to hypoxia and the plaque metabolic microenvironment. However, it

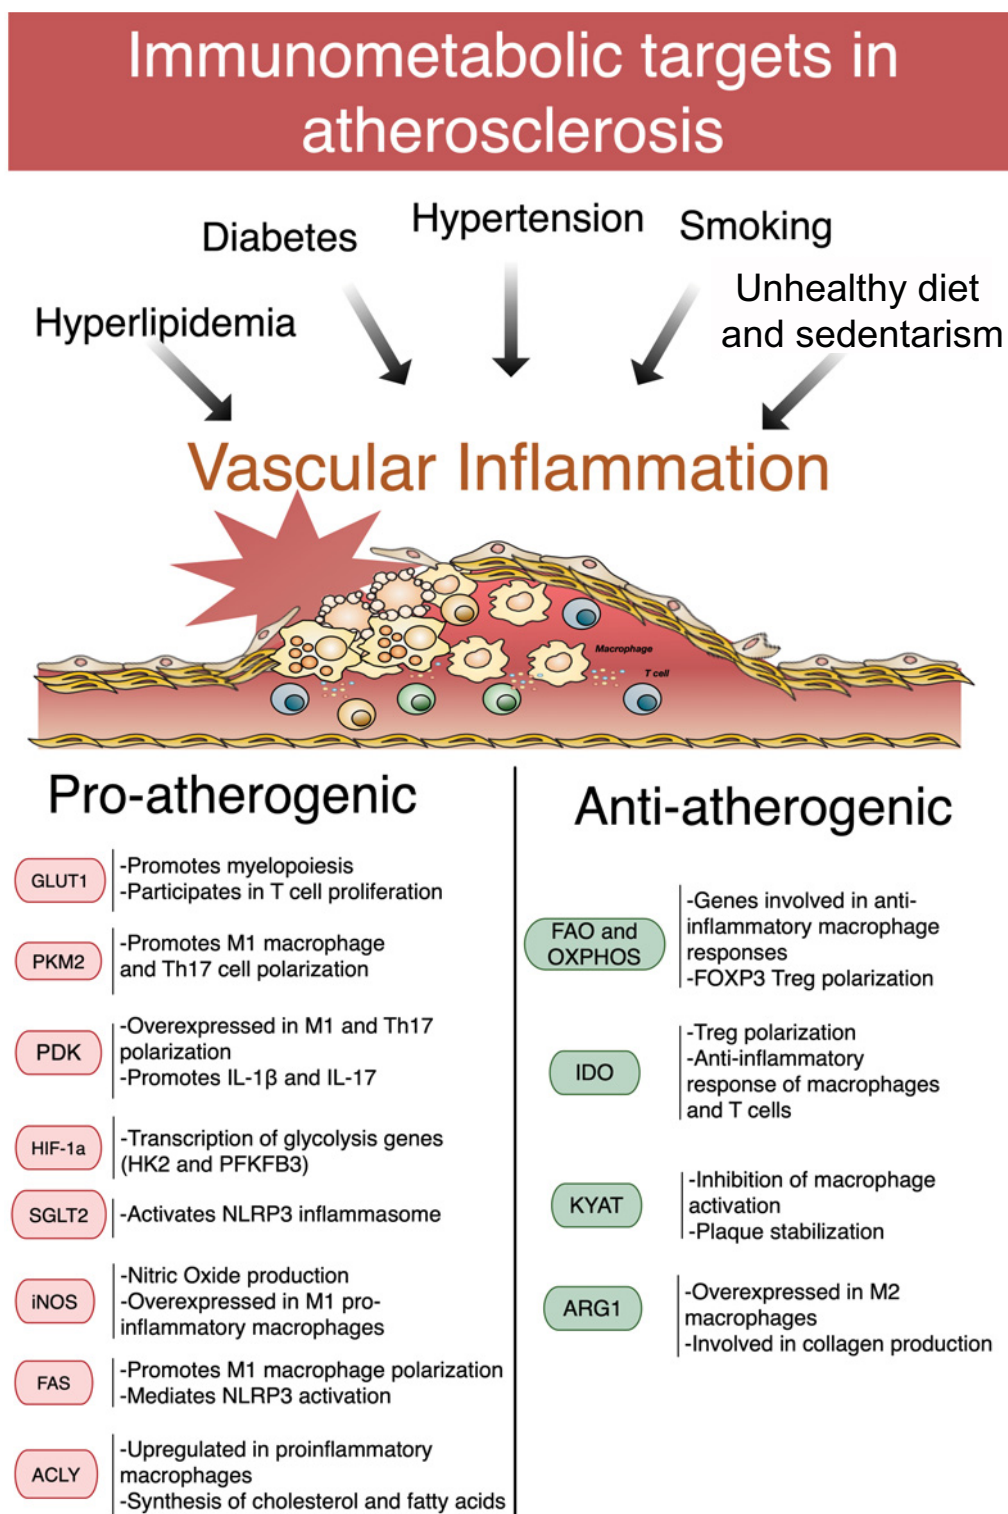

**Figure 1. Immunometabolic targets in atherosclerosis**

Cardiometabolic risk factors such as hyperlipidaemia, diabetes, hypertension, smoking, unhealthy diet, and sedentarism contribute to inflammation in the vascular wall, fibrous cap formation, and eventually rupture of the atherosclerotic plaque. Alterations in metabolic enzymes carry the potential to influence plaque progression (pro-atherogenic) or stabilisation (anti-inflammatory), becoming potential targets for immunometabolic modulation in atherosclerosis. Bottom panel highlights major mechanisms associated with different metabolic enzymes. Abbreviations: ARG1, arginase 1; FAS, fatty acid synthase; GLUT1, glucose transporter 1; HIF-1 $\alpha$ , hypoxia inducible factor 1 $\alpha$ ; KYAT, kynurenine oxoglutarate transaminase; SGLT2, sodium-glucose cotransporter-2.

has been recently revealed that macrophage activation by oxLDL can increase glycolysis independent of HIF1 $\alpha$  activation but still regulate the expression of glycolytic enzymes such as hexokinase 2 (HK2) and 6-phosphofructo-2 kinase/fructose-2,6-biphosphatase 3 (PFKFB3) [119,120].

T-cell polarisation into either Treg or Th17 lineages depends on the combination of cytokines, as well as metabolic substrate availability. Th17 cells resemble M1 macrophages and overexpress glycolytic enzymes such as PKM2 or PDK1. While the inhibition of glycolysis in Th17 cells has been linked to preferential expansion of Tregs [121], the inhibition of glycolytic enzymes in atherosclerosis could have potential implications for both M1 macrophages and Th17 cells. In this context, the inhibition of PKM2 tetramerisation in CD4 T cells has been demonstrated to reduce hyperhomocysteinemia-accelerated atherosclerosis [122].

It has been previously established that hyperglycaemia, which is associated with type 1 or type 2 diabetes mellitus, is an independent risk factor for atherosclerotic CVD [123,124]. However, the explanation about the mechanisms that could help trigger or accelerate disease remain incomplete. Macrophages from patients with diabetes show an inflammatory phenotype [125]. It has been shown that hyperglycaemia promotes myelopoiesis and exacerbates atherosclerotic lesions [126], and that lowering glucose levels can correct this phenotype [125].

It has been suggested that glucose lowering could be an effective strategy to decrease atherosclerotic risk in diabetic patients. Although glycaemic control reduces major cardiovascular events in type 1 diabetes patients [127], several studies conducted on type 2 diabetes (T2D) patients showed that lowering glucose levels did not reduce cardiovascular risk [128]. Thus, it has been speculated that other cardiovascular risk factors, such as dyslipidaemia, obesity and hypertension, which are also often associated with T2D, could mask the effect of the conventional treatment of glucose lowering [129].

The recent use of new classes of antidiabetic drugs, such as sodium glucose cotransporter-2 (SLG2) inhibitors and the incretin hormone glucagon-like peptide 1 (GLP1) agonists, seems to have contradicted the previous dogma by showing glucose lowering associated with a significant reduction in CVD risk [130]. Although it remains unclear why these drugs have cardioprotective effects while other drugs that also reduce glycaemia do not, recent studies suggest these new drugs can also influence immunity. It has been proposed that SLG2 inhibition reduces atherosclerosis in *ApoE*<sup>−/−</sup> mice through regulation of the NLRP3 inflammasome expression in macrophages [131]. Interestingly, it has been shown that a subset of T cells in the gut can modulate systemic metabolism and contribute to CVD by limiting the bioavailability of GLP1 [132].

Still in the context of potential explanations for why lowering glucose levels *per se* does not influence CVD risk, it has been proposed that hyperglycaemia can induce ‘trained immunity’ in myeloid precursors and differentiated cells. Trained immunity is characterised by the ‘long-term’ epigenetic reprogramming of innate immune cells mediated by exogenous or endogenous insults, conferring ‘memory’ to these cells even when they return to a non-activated state [133]. This phenomenon has, for example, been identified in circulating leucocytes from T2D patients [134,135]. It has been shown that in diabetic mice, high glucose levels induce epigenetic modifications in bone marrow progenitors that persist until after these cells differentiate into macrophages. Interestingly, the transplantation of haematopoietic stem cells from mice with diabetes to euglycaemic recipient mice was shown to be sufficient to accelerate atherosclerosis [136], indicating that metabolic imprints on immune cell precursors could be sufficient to jeopardise some therapeutic approaches.

## Lipid metabolism in macrophages and T cells in atherosclerosis

Atherosclerotic plaques are especially rich in lipids. The uptake of modified lipids, such as oxLDL, via scavenger receptors on macrophages is a key feature in the formation of foam cells. Subsequent accumulation leads to the formation of fatty streaks and advanced atherosclerotic lesions. LDL modifications can alter macrophage metabolic activity [137]. *In vitro* and *in vivo* studies have shown that oxLDL can up-regulate glycolysis, inflammation and oxidative stress in macrophages [138,139]. Interestingly, myeloid cells from *LDLR*<sup>−/−</sup> mice fed a high-fat diet exhibited signs of long-lasting epigenetic changes and metabolic reprogramming that are characteristic of trained immunity [138].

Alterations in cholesterol metabolism have been associated with numerous consequences to immunity. For example, in innate immune cells, changes in intracellular cholesterol can lead not only to foam cell formation but also inflammasome activation on macrophages, and neutrophil extracellular traps (NETs)-induced cell death or NETosis by neutrophils [140]. It has been shown that enrichment of cholesterol in lipid rafts in human pluripotent stem cells promotes proliferation and mobilisation of bone marrow cells, leading to leucocytosis [141–143]. In this context, liver X receptor (LXR)-mediated signalling, and the regulation cholesterol efflux, including the transcription-regulation of the ATP-binding cassette transporters ABCA1 and ABCG1, have been proposed as major regulators of cholesterol-driven exacerbation of immune responses [144–147].

As mentioned earlier, FAS and FAO play important roles in macrophage polarisation [148,149]. In this context, the multicomplex enzyme FASN has been shown to play an important role in M1 macrophage polarisation [150]. Considering the proinflammatory nature of M1 macrophages, specific deletion of *Fasn* in macrophages was shown to reduce atherosclerotic plaque formation and foam cell formation in *ApoE*<sup>−/−</sup> mice [151]. It has been shown that hypoxia, which is frequently found in advanced atherosclerotic plaques, enhances FAS, suppresses FAO, and promotes triglyceride-laden macrophage formation [152]. Interestingly, based on single-cell analysis, two recent studies suggested that foam cells do not express inflammatory cytokines and that instead, these cells could help suppress inflammatory responses in the plaque [40,41].

It has been recently reported that oxidised 1-palmitoyl-2-arachidonoyl-sn-glycero-3-phosphorylcholine (oxPAPC), which is considered a proatherogenic modified fatty acid, potentiates the effects of LPS on macrophage metabolism, inducing a hypermetabolic state on these cells that accelerates atherosclerosis. Surprisingly, oxPAPC-triggered cells resembled a mixed metabolic profile of M1 and M2 macrophages, including increased glycolysis and OXPHOS, which was paralleled with large amounts of IL-1 $\beta$  production, a characteristic of only M1 macrophages [153]. Although these data initially sounded confusing, raising questions to which extent metabolic skewing can govern macrophage polarisation in the atherosclerotic plaque, they highlight how complex macrophage repertoires can be in chronic inflammatory processes. Moreover, this finding may help explain why targeting inflammation to prevent CVD remains challenging.

It has been shown recently that the expression of the surface marker TREM2 (Triggering-receptor-expressed on myeloid cells 2) on macrophages (TREM2hi) in the intima was associated with the expression of genes linked to lipid metabolism and cholesterol efflux [41]; TREM-2 that is also highly expressed in adipose tissue-associated macrophages (ATMs). In this context, it has been shown that mice lacking TREM2 do not form ATM populations during obesity, and glucose homeostasis in adipose tissue is influenced [154]. Whether TREM2+ macrophages link to lipid overload and lipotoxicity play a role in the progression or regression of atherosclerosis warrants deeper investigations.

ACLY, which is involved in fatty acid and cholesterol biosynthesis by influencing acetyl-CoA formation from citrate, has been recently shown to be up-regulated in inflammatory macrophages in human atherosclerotic plaques [155]. Hence, hypercholesterolaemic mice with ACLY deficiency in myeloid cells developed macrophages with deregulated fatty acid and cholesterol synthesis and a more stable plaque phenotype [156]. In line with these data, bempedoic acid, an ACLY inhibitor that is used to reduce cholesterol synthesis and treat dyslipidaemia, was shown to attenuate atherosclerosis in *ApoE*<sup>−/−</sup> mice and *LDLR*<sup>−/−</sup> mice [157]. Recent clinical trials have shown that bempedoic acid significantly lowers LDL as a monotherapy or combination therapy and could have add-on effects with statin therapy in statin-intolerant patients [155]. The fact that ACLY inhibition influences vascular inflammation and atherogenesis in murine models suggests that targeting this enzyme could be a promising therapeutic strategy to combat CVDs.

Tregs are unable to develop in the absence of fatty acids or when FAO is inhibited. On the other hand, palmitate exposure can selectively induce the apoptosis in Treg cells, suggesting that the availability of certain lipids can skew the Treg/Teff ratio. In this context, it has been shown that *Foxp3* expression can regulate the expression of enzymes associated with FAO and mitochondrial OXPHOS [158]. *FOXP3* expression can selectively impair the survival of cells exposed to saturated fatty acids and in environments with low glucose and high lactate, such as atherosclerotic plaques or the tumour microenvironment [159].

The mechanisms of fatty acid biosynthesis and cholesterol synthesis are strongly up-regulated in activated T cells [81]. Cholesterol and cholesterol derivatives can shape plasma membrane fluidity and participate in the dynamics of lipid rafts, thereby changing the colocalisation of crucial receptors, including the immunological synapse form during TCR recognition of epitope-MHC-II on antigen presenting cells [160]. Cholesterol levels in proliferating T cells are maintained in part through the opposing transcriptional activities of sterol regulatory element-binding protein 2 (SREBP2) that is up-regulated, and the LXR that is down-regulated [145].

It has been shown that intracellular cholesterol homeostasis is crucial for maintaining Treg stability and function [161]. However, a substantial accumulation of intracellular cholesterol, which occurs in atherosclerosis, may disrupt homeostasis and promote disease progression through the conversion of Tregs into T effector cells [162]. Studies on *ApoE*<sup>−/−</sup> mice showed that high-fat diet induced an increase in esterified cholesterol in Tregs. Treatment of these mice with apolipoprotein A1 (ApoA1) increased the expression of the cholesterol efflux transporter ABCA1 in Tregs and normalised the cholesterol content in these cells. Of interest, ApoA1 treatment inhibited the conversion of Tregs into proatherogenic T follicular cells and reduced atherosclerosis [163]. Hence, it has been hypothesised that the accumulation of intracellular cholesterol can affect membrane lipid rafts in which IL-2 receptors are enriched, thereby abolishing IL-2 signalling and Treg function and homeostasis [164].

## Amino acid metabolism in macrophages and T cells in atherosclerosis

The metabolism of amino acids has also been implicated in the atherogenic responses of macrophages and T cells [165]. Metabolomics analysis of plasma from *Ldlr*<sup>-/-</sup> mice showed that the levels of the amino acids glycine, glutamine and valine, in parallel with other metabolites such as lactate and citrate, were increased in late stages of atherosclerosis [166]. The same study indicated that some inflammation driven changes in amino acid metabolism were associated with the inhibition of atherosclerosis [166].

One of the most studied amino acids in the context of inflammation is glutamine. In *in vitro* studies, using murine macrophages, it has been suggested that glutamine can promote pro-atherosclerotic responses [167]; this study showed that macrophages from *Apoe*<sup>-/-</sup> mice supplemented with excess glutamine exhibit increased triglyceride biosynthesis due to the activation of SREBP1, and that peritoneal macrophages presented increased ROS production [167]. However, the definitive proof on whether glutamine supplementation could influence atherosclerosis was not evaluated, allowing the possibility of doubt that this amino acid can induce deleterious responses to the vascular wall.

Glutamine plays a key role in cell metabolism by feeding the TCA cycle, which involves the formation of glutamate and its conversion into  $\alpha$ -ketoglutarate [52]. In macrophages subjected to trained immunity, marked increases in succinate and fumarate levels, which have been associated with the inhibition of the histone demethylase, Lysine-specific demethylase 5A (KDM5) and a proinflammatory phenotype, have been observed. Providing macrophages with  $\alpha$ -ketoglutarate, the substrate for KDM5, increased KDM5 availability and suppressed the proinflammatory phenotype [168]. In this context, increased glutaminolysis and the promotion of  $\alpha$ -ketoglutarate formation have been identified as important anti-inflammatory mechanisms that regulate O-GlcNAcylation and inflammation in human adipose tissue [169].

Upon activation, immune cells go through dramatic changes in metabolism to fulfil the bioenergetic, biosynthetic and redox demands of proliferation and differentiation, including increased glutamine metabolism. Increased glutamine metabolism can lead to important antioxidant and anti-inflammatory effects such as the induction the expression of Haem oxygenase 1, heat shock proteins and glutathione; the latter that plays an essential role in controlling redox balance and T cell fate [170], by exerting a strong antioxidative role and protecting cell against stress-induced damage [171]. However, excessive shunting of glutamine to the TCA cycle has been shown to lead to aberrant proinflammatory responses. In these instances, therapeutic targeting of the enzymes involved in glutaminolysis has shown promise in preclinical models investigating angiogenesis [172]. Whether targeting glutaminolysis is relevant in the context atherosclerosis will require further investigations.

L-Arginine metabolism and its by-product nitric oxide have been proven to be vitally important for the early stages of atherosclerosis [173], such as protecting against endothelial dysfunction [174]. However, eNOS overexpression, which can be seen at later stages of disease, lead to the overproduction of NO and has been considered a mechanism of disease acceleration [175]. As competing enzymes for L-arginine metabolism, the two enzymes involved in the degradation of this amino acid, iNOS and ARG1 are known regulators of macrophage responses [176]. In this context, it has been shown that both human and murine atherosclerotic plaques express ARG1 and that its overexpression promotes atherosclerotic plaque stabilisation [165,177].

Tryptophan is another essential amino acid that has been proven to influence atherosclerosis. Genetic and pharmacological inhibition of IDO-1 led to substantial increase in vascular inflammation and atherosclerosis in *Apoe*<sup>-/-</sup> mice [178,179]. In line with these data, IDO1 induction has been linked to atheroprotection and increased plaque stability [180,181]. It has been proposed that IDO-1 expression affects atherosclerosis via multiple mechanisms. Eicosapentaenoic acid administration stimulates IDO-1 expression and reduces vascular inflammation and atherosclerosis in *Ldlr*<sup>-/-</sup> mice, possibly by decreasing the numbers of macrophages, dendritic and T cells [182]. Tregs participate in atherosclerosis by counteracting pro-inflammatory signals and promoting plaque stabilisation [183]. Tregs can also influence inflammation by inducing IDO-1 expression in antigen-presenting cells [180], which can create positive feed-forward loop to increase their numbers. Although an attractive target, IDO-1 stimulation could, however, lead to undesired effects, such as defective immunity and increased susceptibility to infection [184].

Not only IDO1 but also other enzymes involved in tryptophan degradation have been associated with regulation of inflammation, and a deviation in the kynurenine pathway, due to the reduction in the expression of kynurenine oxoglutarate aminotransferases (KYATs), has been associated with an increased probability of developing symptomatic unstable atherosclerotic disease. The same study suggested that signalling through aryl hydrocarbon receptor (AhR), mediated through the bioproduct of the KYATs kynurenic acid (KynA), could be a key mechanism regulating vascular inflammation [185].

A deleterious role of this pathway has also been reported in the context of atherosclerosis. It has been shown that human atherosclerotic lesions can exhibit increased levels of KynA, which was associated with an unstable plaque phenotype and the recurrence of myocardial infarction in patients with coronary artery disease [186]. Hence, the same group showed that endothelial cells (ECs) but not inflammatory cells from mice with myocardial infarction were the main producers of KynA. Mice with specific deletion of IDO1 in ECs showed improvements in cardiac function, as well as cardiomyocyte contractility, and a reduction in adverse ventricular remodelling [187].

## The metabolic regulation of vascular cell inflammatory responses

To maintain vascular homeostasis, ECs mainly use glycolysis and other glycolytic pathways for ATP generation, such as the HBP and the PPP, rather than OXPHOS [188]. It has been suggested that the low mitochondrial volume in ECs in comparison with other cell types could explain this metabolic preference in the healthy state [189]. Mitochondria seems to play a pivotal role in endothelial function, as it has been shown that altered mitochondrial dynamics can drive the development of endothelial dysfunction in some metabolic diseases, such as T2D, and atherosclerosis [190,191].

The full understanding of the molecular mechanisms linking mitochondrial and EC dysfunction has not been completely elucidated. ECs are more sensitive to ROS damage than other vascular cells, such as SMCs [192]. ECs in *ApoE*<sup>−/−</sup> mice and human atherosclerotic plaques exhibit mitochondrial DNA (mtDNA) damage due to ROS, which correlated with the extent of atherosclerosis [193]. In addition, it has been revealed that inherited mtDNA damage mutations in SMCs could initiate vascular damage and promote atherosclerosis [194]. However, the relationship between atherosclerosis and mitochondrial mutations in ECs remains unexplored.

Emerging evidence indicates that epigenetic mechanisms may be implicated in the endothelial dysfunction that precedes vascular complications in T2D. The concept of ‘glycaemic memory’ in ECs refers to constant exposure to a hyperglycaemic environment that is imprinted on the ECs of diabetic patients whose glycaemic control was achieved very early, consequently leading to endothelial dysfunction and vascular complications [195]. Interestingly, ECs metabolise excess glucose into sorbitol via the polyol pathway, which increases ROS and advanced glycation end product (AGE) formation, inducing glycation of respiratory chain proteins and DNA damage [196]. Genome-wide sequencing studies on ECs exposed to a high level of glucose revealed that hyperglycaemia could induce epigenetic changes in the vascular endothelium that were associated with atherosclerosis development, thereby providing another link between diabetes and atherosclerosis pathogenesis [196].

SMCs control vascular tone and diameter through contraction and relaxation. Specially in arteries, SMCs may be not terminally differentiated and exhibit phenotypic plasticity that is regulated by environmental cues [197]. In atherosclerosis, SMCs are stimulated to dedifferentiate from a quiescent contractile phenotype to a synthetic phenotype. This change is accompanied by decreases in the expression of SMC-specific contractile genes and increases in proinflammatory genes that induce proliferation and migration [198].

It has been described that SMCs adapt their metabolism to this phenotypic switch. Thus, contractile SMCs mainly rely on OXPHOS and FAO as sources of acetyl-CoA, while synthetic SMCs preferentially use glycolysis to proliferate and migrate [199]. It has been demonstrated that SMC polarisation towards a synthetic phenotype requires metabolic reprogramming characterised by an increased glycolytic rate and the stabilisation of HIF1 $\alpha$  [200]. Hence, hypoxia and increased lactate production could be important factors that promote the synthetic phenotype [201]. In addition to lactate, it has been recently shown that glutamine also promotes a synthetic phenotype through the down-regulation of miR-143, which affects the proliferation and migration of SMCs [202].

Stable atherosclerotic plaques are characterised by a dense fibrous cap that can be composed by myofibroblasts that transdifferentiate from SMCs. Recent data from single-cell mRNA sequencing have identified that the transdifferentiation of SMCs via endothelial-to-mesenchymal transition (endoMT) induced by IL-1 $\beta$  and TGF $\beta$  is dependent of glycolysis [203].

## Conclusions

In this review, we summarised several relevant findings of the metabolic regulation of immune cells (Figure 2), as well as their potential consequences in atherosclerosis. Increased energy metabolism characterised by high glycolysis, hypoxia, a truncated TCA cycle, fatty acid synthesis and defective amino acid metabolism are associated with inflammation and lipid accumulation in the atherosclerotic plaque. On the other hand, high OXPHOS and FAO are associated with decreased inflammation and potentially with limited atherosclerosis progression.

Although the response to specific metabolites or skewing towards a metabolic route has been extensively studied in simple systems *in vitro*, knowledge of the effects of metabolic alterations on pathophysiological processes *in*

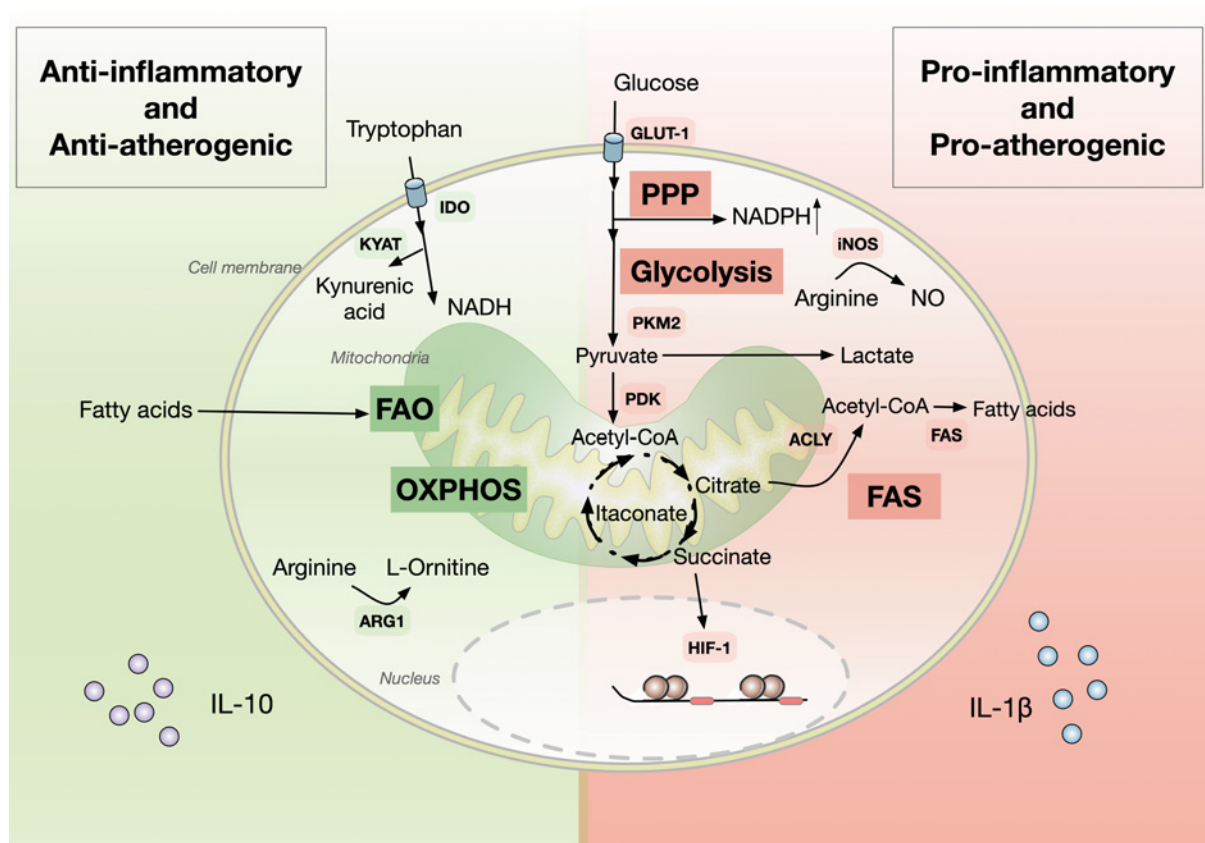

**Figure 2. Major immunometabolic pathways involved vascular inflammation and atherosclerosis**

Pro-inflammatory/pro-atherogenic and anti-inflammatory/anti-atherogenic immune responses are characterised by distinct metabolic traits. Whereas OXPHOS and FAO prevail in anti-inflammatory/anti-atherogenic immune cells (e.g., M2 macrophages and Tregs), glycolysis, PPP, and fatty acid synthesis (FAS) are characteristic in pro-inflammatory/pro-atherogenic immune cells (e.g., M1 macrophages and T effector cells). Abbreviations: ARG1, arginase 1; FAS, fatty acid synthase; GLUT1, glucose transporter 1; HIF-1a, hypoxia inducible factor 1  $\alpha$ ; IDO, indoleamine 2,3-dioxygenase; iNOS, inducible nitric oxidase; SGLT2, sodium-glucose cotransporter-2.

*vivo* remains limited. In this context, in the field of immunometabolism, there is a need for a better understanding of the metabolic adaptations to complex microenvironments. Increasing the number of studies characterising disease tissues using new state-of-the-art technologies, including single-cell transcriptomics and proteomics analyses, combined with classic tissue pathology characterisation, as well as tissue metabolomics, will help researchers better understand the complexity of different signals and metabolic signatures that influence immune and vascular cells. In this context, advancing emerging techniques, such as Matrix-assisted laser desorption/ionisation-mass spectrometry (MALDI-MS) for single-cell and subcellular analysis [204,205], carry the potential to revolutionise our views of complex inflammatory processes, in the atherosclerotic plaque and beyond. The full potential of multiomics analyses to decipher immunometabolism is discussed, in depth, in the excellent review by Artyomov and Van den Bossche (2020) [206].

While many studies are still needed to clarify the role of immune and vascular cell metabolism in atherosclerosis, the studies cited here indicate that targeting immunometabolism to repolarise immune cells towards an anti-inflammatory phenotype appears as a promising therapeutic strategy to reduce atherosclerosis. A major limitation of interfering with the metabolism of immune cells could be that systemic delivery of drugs can affect other cells and organs, possibly generating deleterious off-target effects. The identification of more selective drugs that can target unique characteristics of pro- or anti-inflammatory cells would be a breakthrough for future disease treatment. In this context, targeting enzyme isoforms that are predominantly expressed in proinflammatory cells and have low expression in anti-inflammatory or stromal cells could have good specificity and reduce unwanted side effects.

An interesting point of reflection raised by this review is the fact that metabolic changes can affect immune cells precursors in the bone marrow. This epigenetic memory imprinted by metabolic changes may represent a risk of continuous skewing of inflammatory cells. Being able to reverse deleterious epigenetic signatures in progenitor cells could be an efficient way to create stable anti-inflammatory responses.

In summary, there is accumulating evidence that immunometabolism is affected by systemic pro-atherogenic factors in the blood and bone marrow niche, as well as within the atherosclerotic plaque environment. Further elucidation of the metabolic mechanisms governing vascular inflammation and atherogenesis carries a high potential to provide novel pharmacological targets to combat CVDs.

## Competing Interests

D.F.J.K. holds patents on the use of Trp metabolites and analogues for the prevention and treatment of hyperlipidaemia and its complications.

The author (M.J.F.) declares that there are no competing interests associated with the manuscript.

## Funding

This work was supported by the Swedish Heart-Lung Foundation; the Novo Nordisk Foundation [grant numbers NNF15CC0018346, 0064142]; the University of Southern Denmark; the Stiftelsen för Gamla Tjänarinnor; and the Foundation for Geriatric Diseases at Karolinska Institute.

## Open Access

Open access for this article was enabled by the participation of Karolinska Institute in an all-inclusive *Read & Publish* agreement with Portland Press and the Biochemical Society.

## Abbreviations

ACLY, ATP-citrate lyase; ApoA1, apolipoprotein A1; ATM, adipose tissue-associated macrophage; CoA, coenzyme A; CVD, cardiovascular disease; EC, endothelial cell; FAO, fatty acid oxidation; GLP1, glucagon-like peptide 1; HBP, hexosamine biosynthesis pathway; HIF1 $\alpha$ , hypoxia-inducible factor-1 $\alpha$ ; IDO, indoleamine 2,3-dioxygenase; IFN $\gamma$ , interferon  $\gamma$ ; iNOS, inducible nitric oxide synthase; KDM5, lysine-specific demethylase 5A; KYAT, kynurenine oxoglutarate transaminase; KynA, kynurenic acid; LDL, low-density lipoprotein; LXR, liver X receptor; MetS, metabolic syndrome; MHC, major histocompatibility complex; mtDNA, mitochondrial DNA; NADPH, nicotinamide adenine dinucleotide phosphate; oxLDL, oxidised LDL; oxPAPC, oxidised 1-palmitoyl-2-arachidonyl-sn-glycero-3-phosphorylcholine; OXPHOS, oxidative phosphorylation; O-GlcNAc, O-linked B-N-acetylglucosamine; PDK1, pyruvate dehydrogenase kinase 1; PKM2, pyruvate kinase M2; PPP, pentose phosphate pathway; ROS, reactive oxygen species; SGLT2, sodium glucose cotransporter-2; SMC, smooth muscle cell; Teff, effector T; Th, T helper; Treg, regulatory T cell; T2D, type 2 diabetes; UDP-GlcNAc, uridine diphosphate N-acetylglucosamine.

## References

- Libby, P., Buring, J.E., Badimon, L. et al. (2019) Atherosclerosis. *Nat. Rev. Dis. Primers* **5**, 56, <https://doi.org/10.1038/s41572-019-0106-z>
- Mach, F., Baigent, C., Catapano, A.L. et al. (2020) 2019 ESC/EAS Guidelines for the management of dyslipidaemias: lipid modification to reduce cardiovascular risk. *Eur. Heart J.* **41**, 111–188, <https://doi.org/10.1093/eurheartj/ehz455>
- Palinski, W. and Napoli, C. (1999) Pathophysiological events during pregnancy influence the development of atherosclerosis in humans. *Trends Cardiovasc. Med.* **9**, 205–214, [https://doi.org/10.1016/S1050-1738\(00\)00022-0](https://doi.org/10.1016/S1050-1738(00)00022-0)
- Mihaylova, B., Emberson, J., Cholesterol Treatment Trialists Consortium et al. (2012) The effects of lowering LDL cholesterol with statin therapy in people at low risk of vascular disease: meta-analysis of individual data from 27 randomised trials. *Lancet* **380**, 581–590, [https://doi.org/10.1016/S0140-6736\(12\)60367-5](https://doi.org/10.1016/S0140-6736(12)60367-5)
- Islam, J.Y., Zaman, M.M., Moniruzzaman, M., Ara Shakoor, S. and Hossain, A. (2020) Estimation of total cardiovascular risk using the 2019 WHO CVD prediction charts and comparison of population-level costs based on alternative drug therapy guidelines: a population-based study of adults in Bangladesh. *BMJ Open* **10**, e035842, <https://doi.org/10.1136/bmjopen-2019-035842>
- Ketelhuth, D.F. and Hansson, G.K. (2016) Adaptive response of T and B cells in atherosclerosis. *Circ. Res.* **118**, 668–678, <https://doi.org/10.1161/CIRCRESAHA.115.306427>
- Ketelhuth, D.F. and Hansson, G.K. (2015) Modulation of autoimmunity and atherosclerosis - common targets and promising translational approaches against disease. *Circ. J.* **79**, 924–933, <https://doi.org/10.1253/circj.CJ-15-0167>
- Gistera, A. and Hansson, G.K. (2017) The immunology of atherosclerosis. *Nat. Rev. Nephrol.* **13**, 368–380, <https://doi.org/10.1038/nrneph.2017.51>
- Winkels, H., Ehinger, E., Vassallo, M. et al. (2018) Atlas of the immune cell repertoire in mouse atherosclerosis defined by single-cell RNA-sequencing and mass cytometry. *Circ. Res.* **122**, 1675–1688, <https://doi.org/10.1161/CIRCRESAHA.117.312513>
- Ruuth, M., Nguyen, S.D., Vihervaara, T. et al. (2018) Susceptibility of low-density lipoprotein particles to aggregate depends on particle lipidome, is modifiable, and associates with future cardiovascular deaths. *Eur. Heart J.* **39**, 2562–2573, <https://doi.org/10.1093/eurheartj/ehy319>

- 11 Childs, B.G., Baker, D.J., Wijshake, T., Conover, C.A., Campisi, J. and van Deursen, J.M. (2016) Senescent intimal foam cells are deleterious at all stages of atherosclerosis. *Science* **354**, 472–477, <https://doi.org/10.1126/science.aaf6659>
- 12 Ketelhuth, D.F. and Back, M. (2011) The role of matrix metalloproteinases in atherothrombosis. *Curr. Atheroscler. Rep.* **13**, 162–169, <https://doi.org/10.1007/s11883-010-0159-7>
- 13 Hansson, G.K., Libby, P. and Tabas, I. (2015) Inflammation and plaque vulnerability. *J. Intern. Med.* **278**, <https://doi.org/10.1111/joim.12406>
- 14 Cochain, C., Koch, M., Chaudhari, S.M., Busch, M., Pelisek, J., Boon, L. et al. (2015) CD8+ T cells regulate monopoiesis and circulating Ly6C-high monocyte levels in atherosclerosis in mice. *Circ. Res.* **117**, 244–253, <https://doi.org/10.1161/CIRCRESAHA.117.304611>
- 15 Hansson, G.K. and Hermansson, A. (2011) The immune system in atherosclerosis. *Nat. Immunol.* **12**, 204–212, <https://doi.org/10.1038/ni.2001>
- 16 Ketelhuth, D.F. and Hansson, G.K. (2016) Adaptive response of T and B cells in atherosclerosis. *Circ. Res.* **118**, 668–678
- 17 Moore, K.J., Sheedy, F.J. and Fisher, E.A. (2013) Macrophages in atherosclerosis: a dynamic balance. *Nat. Rev. Immunol.* **13**, 709–721, <https://doi.org/10.1038/nri3520>
- 18 Swirski, F.K., Nahrendorf, M. and Libby, P. (2016) Mechanisms of myeloid cell modulation of atherosclerosis. *Microbiol. Spectr.* **4**, <https://doi.org/10.1128/microbiolspec.MCHD-0026-2015>
- 19 Back, M., Yurdagul, Jr. A., Tabas, I., Oorni, K. and Kovanen, P.T. (2019) Inflammation and its resolution in atherosclerosis: mediators and therapeutic opportunities. *Nat. Rev. Cardiol.* **16**, 389–406, <https://doi.org/10.1038/s41569-019-0169-2>
- 20 Tabas, I. (2010) Macrophage death and defective inflammation resolution in atherosclerosis. *Nat. Rev. Immunol.* **10**, 36–46, <https://doi.org/10.1038/nri2675>
- 21 Laguna-Fernandez, A., Checa, A., Carracedo, M. et al. (2018) ERV1/ChemR23 signaling protects against atherosclerosis by modifying oxidized low-density lipoprotein uptake and phagocytosis in macrophages. *Circulation* **138**, 1693–1705, <https://doi.org/10.1161/CIRCULATIONAHA.117.032801>
- 22 Sakaguchi, S., Yamaguchi, T., Nomura, T. and Ono, M. (2008) Regulatory T cells and immune tolerance. *Cell* **133**, 775–787, <https://doi.org/10.1038/s41577-020-0285-6>
- 23 Ait-Oufella, H., Taleb, S., Mallat, Z. and Tedgui, A. (2011) Recent advances on the role of cytokines in atherosclerosis. *Arterioscler. Thromb. Vasc. Biol.* **31**, 969–979, <https://doi.org/10.1161/ATVBAHA.110.207415>
- 24 Hansson, G.K. and Nilsson, J. (2020) Developing a vaccine against atherosclerosis. *Nat. Rev. Cardiol.* **17**, 451–452, <https://doi.org/10.1038/s41569-020-0407-7>
- 25 Ridker, P.M., Everett, B.M., Thuren, T. et al. (2017) Antiinflammatory therapy with Canakinumab for atherosclerotic disease. *N. Engl. J. Med.* **377**, 1119–1131, <https://doi.org/10.1056/NEJMoa1707914>
- 26 Everett, B.M., MacFadyen, J.G., Thuren, T., Libby, P., Glynn, R.J. and Ridker, P.M. (2020) Inhibition of interleukin-1beta and reduction in atherothrombotic cardiovascular events in the CANTOS Trial. *J. Am. Coll. Cardiol.* **76**, 1660–1670, <https://doi.org/10.1016/j.jacc.2020.08.011>
- 27 Nidorf, S.M., Fiolet, A.T.L., Mosterd, A. et al. (2020) Colchicine in patients with chronic coronary disease. *N. Engl. J. Med.* **383**, 1838–1847, <https://doi.org/10.1056/NEJMoa2021372>
- 28 Ridker, P.M., Everett, B.M., Pradhan, A. et al. (2019) Low-dose methotrexate for the prevention of atherosclerotic events. *N. Engl. J. Med.* **380**, 752–762, <https://doi.org/10.1056/NEJMoa1809798>
- 29 Jung, J., Zeng, H. and Horng, T. (2019) Metabolism as a guiding force for immunity. *Nat. Cell Biol.* **21**, 85–93, <https://doi.org/10.1038/s41556-018-0217-x>
- 30 Warburg, O., Wind, F. and Negelein, E. (1927) The metabolism of tumors in the body. *J. Gen. Physiol.* **8**, 519–930, <https://doi.org/10.1085/jgp.8.6.519>
- 31 Frauwirth, K.A., Riley, J.L., Harris, M.H. et al. (2002) The CD28 signaling pathway regulates glucose metabolism. *Immunity* **16**, 769–777, [https://doi.org/10.1016/S1074-7613\(02\)00323-0](https://doi.org/10.1016/S1074-7613(02)00323-0)
- 32 Kelly, B. and O'Neill, L.A. (2015) Metabolic reprogramming in macrophages and dendritic cells in innate immunity. *Cell Res.* **25**, 771–784, <https://doi.org/10.1038/cr.2015.68>
- 33 Newsholme, P., Gordon, S. and Newsholme, E.A. (1987) Rates of utilization and fates of glucose, glutamine, pyruvate, fatty acids and ketone bodies by mouse macrophages. *Biochem. J.* **242**, 631–636, <https://doi.org/10.1042/bj2420631>
- 34 Van den Bossche, J., Baardman, J. and de Winther, M.P. (2015) Metabolic characterization of polarized M1 and M2 bone marrow-derived macrophages using real-time extracellular flux analysis. *J. Vis. Exp.* **105**, 53424, <https://doi.org/10.3791/53424>
- 35 Xie, N., Zhang, L., Gao, W. et al. (2020) NAD(+) metabolism: pathophysiologic mechanisms and therapeutic potential. *Signal Transduct. Target Ther.* **5**, 227, <https://doi.org/10.1038/s41392-020-00311-7>
- 36 Mosser, D.M. and Edwards, J.P. (2008) Exploring the full spectrum of macrophage activation. *Nat. Rev. Immunol.* **8**, 958–969, <https://doi.org/10.1172/jci.insight.124574>
- 37 Orecchioni, M., Ghosheh, Y., Pramod, A.B. and Ley, K. (2019) Macrophage polarization: different gene signatures in M1(LPS+) vs. classically and M2(LPS-) vs. alternatively activated macrophages. *Front. Immunol.* **10**, 1084, <https://doi.org/10.3389/fimmu.2019.01084>
- 38 Cole, J.E., Park, I., Ahern, D.J. et al. (2018) Immune cell census in murine atherosclerosis: cytometry by time of flight illuminates vascular myeloid cell diversity. *Cardiovasc. Res.* **114**, 1360–1371, <https://doi.org/10.1093/cvr/cvy109>
- 39 Winkels, H., Ehinger, E., Vassallo, M. et al. (2018) Atlas of the immune cell repertoire in mouse atherosclerosis defined by single-cell RNA-sequencing and mass cytometry. *Circ. Res.* **122**, 1675–1688, <https://doi.org/10.1161/CIRCRESAHA.117.312513>
- 40 Kim, K., Shim, D., Lee, J.S. et al. (2018) Transcriptome analysis reveals nonfoamy rather than foamy plaque macrophages are proinflammatory in atherosclerotic murine models. *Circ. Res.* **123**, 1127–1142, <https://doi.org/10.1161/CIRCRESAHA.118.312804>
- 41 Cochain, C., Vafadarnejad, E., Arampatzis, P. et al. (2018) Single-cell RNA-seq reveals the transcriptional landscape and heterogeneity of aortic macrophages in murine atherosclerosis. *Circ. Res.* **122**, 1661–1674, <https://doi.org/10.1161/CIRCRESAHA.117.312509>

- 42 Lin, J.D., Nishi, H., Poles, J. et al. (2019) Single-cell analysis of fate-mapped macrophages reveals heterogeneity, including stem-like properties, during atherosclerosis progression and regression. *JCI Insight* **4**, e124574, <https://doi.org/10.1172/jci.insight.124574>
- 43 Zernecke, A., Winkels, H., Cochain, C. et al. (2020) Meta-analysis of leukocyte diversity in atherosclerotic mouse aortas. *Circ. Res.* **127**, 402–426, <https://doi.org/10.1161/CIRCRESAHA.120.316903>
- 44 Fernandez, D.M., Rahman, A.H., Fernandez, N.F. et al. (2019) Single-cell immune landscape of human atherosclerotic plaques. *Nat. Med.* **25**, 1576–1588, <https://doi.org/10.1038/s41591-019-0590-4>
- 45 Depuydt, M.A.C., Prange, K.H.M., Slenders, L. et al. (2020) Microanatomy of the human atherosclerotic plaque by single-cell transcriptomics. *Circ. Res.* **127**, 1437–1455, <https://doi.org/10.1161/CIRCRESAHA.120.316770>
- 46 Hard, G.C. (1970) Some biochemical aspects of the immune macrophage. *Br. J. Exp. Pathol.* **51**, 97–105
- 47 Fukuzumi, M., Shinomiya, H., Shimizu, Y., Ohishi, K. and Utsumi, S. (1996) Endotoxin-induced enhancement of glucose influx into murine peritoneal macrophages via GLUT1. *Infect. Immun.* **64**, 108–112, <https://doi.org/10.1128/iai.64.1.108-112.1996>
- 48 Everts, B., Amiel, E., Huang, S.C. et al. (2014) TLR-driven early glycolytic reprogramming via the kinases TBK1- IKKvarepsilon supports the anabolic demands of dendritic cell activation. *Nat. Immunol.* **15**, 323–332, <https://doi.org/10.1038/ni.2833>
- 49 Liu, L., Lu, Y., Martinez, J. et al. (2016) Proinflammatory signal suppresses proliferation and shifts macrophage metabolism from Myc-dependent to HIF1alpha-dependent. *Proc. Natl. Acad. Sci. U.S.A.* **113**, 1564–1569, <https://doi.org/10.1073/pnas.1518000113>
- 50 Newsholme, P., Curi, R., Gordon, S. and Newsholme, E.A. (1986) Metabolism of glucose, glutamine, long-chain fatty acids and ketone bodies by murine macrophages. *Biochem. J.* **239**, 121–125, <https://doi.org/10.1042/bj2390121>
- 51 Viola, A., Munari, F., Sanchez-Rodriguez, R., Scolaro, T. and Castegna, A. (2019) The metabolic signature of macrophage responses. *Front. Immunol.* **10**, 1462, <https://doi.org/10.3389/fimmu.2019.01462>
- 52 Jha, A.K., Huang, S.C., Sergushichev, A. et al. (2015) Network integration of parallel metabolic and transcriptional data reveals metabolic modules that regulate macrophage polarization. *Immunity* **42**, 419–430, <https://doi.org/10.1016/j.immuni.2015.02.005>
- 53 Dominguez, M., Brune, B. and Namgaladze, D. (2021) Exploring the role of ATP-citrate lyase in the immune system. *Front. Immunol.* **12**, 632526, <https://doi.org/10.3389/fimmu.2021.632526>
- 54 Lauterbach, M.A., Hanke, J.E., Serefidou, M. et al. (2019) Toll-like receptor signaling rewires macrophage metabolism and promotes histone acetylation via ATP-citrate lyase. *Immunity* **51**, 997e7–1011e7, <https://doi.org/10.1016/j.immuni.2019.11.009>
- 55 Tannahill, G.M., Curtis, A.M., Adamik, J. et al. (2013) Succinate is an inflammatory signal that induces IL-1beta through HIF-1alpha. *Nature* **496**, 238–242, <https://doi.org/10.1038/nature11986>
- 56 Rubic, T., Lametschwandtner, G., Jost, S. et al. (2008) Triggering the succinate receptor GPR91 on dendritic cells enhances immunity. *Nat. Immunol.* **9**, 1261–1269, <https://doi.org/10.1038/ni.1657>
- 57 Love, D.C. and Hanover, J.A. (2005) The hexosamine signaling pathway: deciphering the “O-GlcNAc code”. *Sci. STKE* **2005**, re13, <https://doi.org/10.1126/stke.3122005re13>
- 58 Chang, Y.H., Weng, C.L. and Lin, K.I. (2020) O-GlcNAcylation and its role in the immune system. *J. Biomed. Sci.* **27**, 57, <https://doi.org/10.1186/s12929-020-00648-9>
- 59 Song, N., Qi, Q., Cao, R. et al. (2019) MAVS O-GlcNAcylation is essential for host antiviral immunity against lethal RNA viruses. *Cell Rep.* **28**, 2386e5–2396e5, <https://doi.org/10.1016/j.celrep.2019.07.085>
- 60 Allison, D.F., Wamsley, J.J., Kumar, M. et al. (2012) Modification of RelA by O-linked N-acetylglucosamine links glucose metabolism to NF-kappaB acetylation and transcription. *Proc. Natl. Acad. Sci. U.S.A.* **109**, 16888–16893, <https://doi.org/10.1073/pnas.1208468109>
- 61 Hwang, J.S., Kim, K.H., Park, J., Kim, S.M., Cho, H., Lee, Y. et al. (2019) Glucosamine improves survival in a mouse model of sepsis and attenuates sepsis-induced lung injury and inflammation. *J. Biol. Chem.* **294**, 608–622, <https://doi.org/10.1074/jbc.RA118.004638>
- 62 Hwang, S.Y., Shin, J.H., Hwang, J.S. et al. (2010) Glucosamine exerts a neuroprotective effect via suppression of inflammation in rat brain ischemia/reperfusion injury. *Glia* **58**, 1881–1892, <https://doi.org/10.1002/glia.21058>
- 63 Tabas, I. and Bornfeldt, K.E. (2016) Macrophage phenotype and function in different stages of atherosclerosis. *Circ. Res.* **118**, 653–667, <https://doi.org/10.1161/CIRCRESAHA.115.306256>
- 64 Huang, S.C., Everts, B., Ivanova, Y. et al. (2014) Cell-intrinsic lysosomal lipolysis is essential for alternative activation of macrophages. *Nat. Immunol.* **15**, 846–855, <https://doi.org/10.1038/ni.2956>
- 65 Mehta, M.M., Weinberg, S.E. and Chandel, N.S. (2017) Mitochondrial control of immunity: beyond ATP. *Nat. Rev. Immunol.* **17**, 608–620, <https://doi.org/10.1038/nri.2017.66>
- 66 Vats, D., Mukundan, L., Odegaard, J.I. et al. (2006) Oxidative metabolism and PGC-1beta attenuate macrophage-mediated inflammation. *Cell Metab.* **4**, 13–24, <https://doi.org/10.1016/j.cmet.2006.05.011>
- 67 Nomura, M., Liu, J., Rovira, I.I., Gonzalez-Hurtado, E., Lee, J., Wolfgang, M.J. et al. (2016) Fatty acid oxidation in macrophage polarization. *Nat. Immunol.* **17**, 216–217, <https://doi.org/10.1038/ni.3366>
- 68 Tan, Z., Xie, N., Cui, H., Moellering, D.R., Abraham, E., Thannickal, V.J. et al. (2015) Pyruvate dehydrogenase kinase 1 participates in macrophage polarization via regulating glucose metabolism. *J. Immunol.* **194**, 6082–6089, <https://doi.org/10.4049/jimmunol.1402469>
- 69 Wang, F., Zhang, S., Vuckovic, I. et al. (2018) Glycolytic stimulation is not a requirement for M2 macrophage differentiation. *Cell Metab.* **28**, 463.e4–475.e4, <https://doi.org/10.1016/j.cmet.2018.08.012>
- 70 Kieler, M., Hofmann, M. and Schabbauer, G. (2021) More than just protein building blocks: how amino acids and related metabolic pathways fuel macrophage polarization. *FEBS J.* **288**, 3694–3714, <https://doi.org/10.1111/febs.15715>
- 71 Wallace, C. and Keast, D. (1992) Glutamine and macrophage function. *Metabolism* **41**, 1016–1020, [https://doi.org/10.1016/0026-0495\(92\)90130-3](https://doi.org/10.1016/0026-0495(92)90130-3)
- 72 Meiser, J., Kramer, L., Sapcaru, S.C. et al. (2016) Pro-inflammatory macrophages sustain pyruvate oxidation through pyruvate dehydrogenase for the synthesis of itaconate and to enable cytokine expression. *J. Biol. Chem.* **291**, 3932–3946, <https://doi.org/10.1074/jbc.M115.676817>

- 73 Liu, P.S., Wang, H., Li, X. et al. (2017) alpha-ketoglutarate orchestrates macrophage activation through metabolic and epigenetic reprogramming. *Nat. Immunol.* **18**, 985–994, <https://doi.org/10.1038/ni.3796>
- 74 Iommarini, L., Porcelli, A.M., Gasparre, G. and Kurelac, I. (2017) Non-canonical mechanisms regulating hypoxia- inducible factor 1 alpha in cancer. *Front. Oncol.* **7**, 286, <https://doi.org/10.3389/fonc.2017.00286>
- 75 Polyzos, K.A. and Ketelhuth, D.F. (2015) The role of the kynurenine pathway of tryptophan metabolism in cardiovascular disease. An emerging field. *Hamostaseologie* **35**, 128–136, <https://doi.org/10.5482/HAMO-14-10-0052>
- 76 Wang, X.F., Wang, H.S., Wang, H. et al. (2014) The role of indoleamine 2,3-dioxygenase (IDO) in immune tolerance: focus on macrophage polarization of THP-1 cells. *Cell. Immunol.* **289**, 42–48, <https://doi.org/10.1016/j.cellimm.2014.02.005>
- 77 Lee, S.M., Park, H.Y., Suh, Y.S. et al. (2017) Inhibition of acute lethal pulmonary inflammation by the IDO-AhR pathway. *Proc. Natl. Acad. Sci. U.S.A.* **114**, E5881–E5890, <https://doi.org/10.1073/pnas.1615280114>
- 78 Mellor, A. (2005) Indoleamine 2,3 dioxygenase and regulation of T cell immunity. *Biochem. Biophys. Res. Commun.* **338**, 20–24, <https://doi.org/10.1016/j.bbrc.2005.08.232>
- 79 Worthington, J., Robson, T., Murray, M., O'Rourke, M., Keilty, G. and Hirst, D.G. (2000) Modification of vascular tone using iNOS under the control of a radiation-inducible promoter. *Gene Ther.* **7**, 1126–1131, <https://doi.org/10.1038/sj.gt.3301224>
- 80 Van den Bossche, J., Baardman, J., Otto, N.A. et al. (2016) Mitochondrial dysfunction prevents repolarization of inflammatory macrophages. *Cell Rep.* **17**, 684–696, <https://doi.org/10.1016/j.celrep.2016.09.008>
- 81 Fox, C.J., Hammerman, P.S. and Thompson, C.B. (2005) Fuel feeds function: energy metabolism and the T-cell response. *Nat. Rev. Immunol.* **5**, 844–852, <https://doi.org/10.1038/nri1710>
- 82 Jacobs, S.R., Herman, C.E., Maciver, N.J., Wofford, J.A., Wieman, H.L., Hammen, J.J. et al. (2008) Glucose uptake is limiting in T cell activation and requires CD28-mediated Akt-dependent and independent pathways. *J. Immunol.* **180**, 4476–4486, <https://doi.org/10.4049/jimmunol.180.7.4476>
- 83 O'Sullivan, D. and Pearce, E.L. (2015) Targeting T cell metabolism for therapy. *Trends Immunol.* **36**, 71–80, <https://doi.org/10.1016/j.it.2014.12.004>
- 84 Chang, C.H., Curtis, J.D., Maggi, Jr, L.B. et al. (2013) Posttranscriptional control of T cell effector function by aerobic glycolysis. *Cell* **153**, 1239–1251, <https://doi.org/10.1016/j.cell.2013.05.016>
- 85 Alves, N.L., Derks, I.A.M., Berk, E., Spijker, R., van Lier, R.A.W. and Eldering, E. (2006) The Noxa/Mcl-1 axis regulates susceptibility to apoptosis under glucose limitation in dividing T cells. *Immunity* **24**, 703–716, <https://doi.org/10.1016/j.immuni.2006.03.018>
- 86 van der Windt, G.J. and Pearce, E.L. (2012) Metabolic switching and fuel choice during T-cell differentiation and memory development. *Immunol. Rev.* **249**, 27–42, <https://doi.org/10.1111/j.1600-065X.2012.01150.x>
- 87 Sagone, Jr, A.L., LoBuglio, A.F. and Balcerzak, S.P. (1974) Alterations in hexose monophosphate shunt during lymphoblastic transformation. *Cell. Immunol.* **14**, 443–452, [https://doi.org/10.1016/0008-8749\(74\)90195-6](https://doi.org/10.1016/0008-8749(74)90195-6)
- 88 Swamy, M., Pathak, S., Grzes, K.M., Damerow, S., Sinclair, L.V., van Aalten, D.M. et al. (2016) Glucose and glutamine fuel protein O-GlcNAcylation to control T cell self-renewal and malignancy. *Nat. Immunol.* **17**, 712–720, <https://doi.org/10.1038/ni.3439>
- 89 Buck, M.D., O'Sullivan, D. and Pearce, E.L. (2015) T cell metabolism drives immunity. *J. Exp. Med.* **212**, 1345–1360, <https://doi.org/10.1084/jem.20151159>
- 90 Carr, E.L., Kelman, A., Wu, G.S. et al. (2010) Glutamine uptake and metabolism are coordinately regulated by ERK/MAPK during T lymphocyte activation. *J. Immunol.* **185**, 1037–1044, <https://doi.org/10.4049/jimmunol.0903586>
- 91 O'Shea, J.J. and Paul, W.E. (2010) Mechanisms underlying lineage commitment and plasticity of helper CD4+ T cells. *Science* **327**, 1098–1102, <https://doi.org/10.1126/science.1178334>
- 92 Zeng, H. and Chi, H. (2015) Metabolic control of regulatory T cell development and function. *Trends Immunol.* **36**, 3–12, <https://doi.org/10.1016/j.it.2014.08.003>
- 93 Delgoffe, G.M., Kole, T.P., Zheng, Y. et al. (2009) The mTOR kinase differentially regulates effector and regulatory T cell lineage commitment. *Immunity* **30**, 832–844, <https://doi.org/10.1016/j.immuni.2009.04.014>
- 94 Kopf, H., de la Rosa, G.M., Howard, O.M. and Chen, X. (2007) Rapamycin inhibits differentiation of Th17 cells and promotes generation of FoxP3+ T regulatory cells. *Int. Immunopharmacol.* **7**, 1819–1824, <https://doi.org/10.1016/j.intimp.2007.08.027>
- 95 Michalek, R.D., Gerriets, V.A., Jacobs, S.R. et al. (2011) Cutting edge: distinct glycolytic and lipid oxidative metabolic programs are essential for effector and regulatory CD4+ T cell subsets. *J. Immunol.* **186**, 3299–3303, <https://doi.org/10.4049/jimmunol.1003613>
- 96 Lee, K., Gudapati, P., Dragovic, S. et al. (2010) Mammalian target of rapamycin protein complex 2 regulates differentiation of Th1 and Th2 cell subsets via distinct signaling pathways. *Immunity* **32**, 743–753, <https://doi.org/10.1016/j.immuni.2010.06.002>
- 97 Zheng, Y., Delgoffe, G.M., Meyer, C.F., Chan, W. and Powell, J.D. (2009) Anergic T cells are metabolically anergic. *J. Immunol.* **183**, 6095–6101, <https://doi.org/10.4049/jimmunol.0803510>
- 98 Neeland, I.J., Ross, R., Despres, J.P. et al. (2019) Visceral and ectopic fat, atherosclerosis, and cardiometabolic disease: a position statement. *Lancet Diabetes Endocrinol.* **7**, 715–725, [https://doi.org/10.1016/S2213-8587\(19\)30084-1](https://doi.org/10.1016/S2213-8587(19)30084-1)
- 99 Stefan, N. (2020) Causes, consequences, and treatment of metabolically unhealthy fat distribution. *Lancet Diabetes Endocrinol.* **8**, 616–627, [https://doi.org/10.1016/S2213-8587\(20\)30110-8](https://doi.org/10.1016/S2213-8587(20)30110-8)
- 100 Vishram, J.K., Borglykke, A., Andreasen, A.H. et al. (2015) Correction: Impact of age and gender on the prevalence and prognostic importance of the metabolic syndrome and its components in Europeans. The MORGAM Prospective Cohort Project. *PLoS ONE* **10**, e0128848, <https://doi.org/10.1371/journal.pone.0128848>
- 101 Hotamisligil, G.S. (2017) Inflammation, metaflammation and immunometabolic disorders. *Nature* **542**, 177–185, <https://doi.org/10.1038/nature21363>
- 102 Zmora, N., Bashirdes, S., Levy, M. and Elinav, E. (2017) The role of the immune system in metabolic health and disease. *Cell Metab.* **25**, 506–521, <https://doi.org/10.1016/j.cmet.2017.02.006>

- 103 Andersen, C.J., Murphy, K.E. and Fernandez, M.L. (2016) Impact of obesity and metabolic syndrome on immunity. *Adv. Nutr.* **7**, 66–75, <https://doi.org/10.3945/an.115.010207>
- 104 Stefan, N., Birkenfeld, A.L. and Schulze, M.B. (2021) Global pandemics interconnected - obesity, impaired metabolic health and COVID-19. *Nat. Rev. Endocrinol.* **17**, 135–149, <https://doi.org/10.1038/s41574-020-00462-1>
- 105 Duan, Y., Zeng, L., Zheng, C., Song, B., Li, F., Kong, X. et al. (2018) Inflammatory links between high fat diets and diseases. *Front. Immunol.* **9**, 2649, <https://doi.org/10.3389/fimmu.2018.02649>
- 106 Ghanim, H., Aljada, A., Hofmeyer, D., Syed, T., Mohanty, P. and Dandona, P. (2004) Circulating mononuclear cells in the obese are in a proinflammatory state. *Circulation* **110**, 1564–1571, <https://doi.org/10.1161/01.CIR.0000142055.53122.FA>
- 107 Ferreira, A.V., Domínguez-Andrés, J. and Netea, M.G. (2020) The role of cell metabolism in innate immune memory. *J. Innate Immun.* **14**, 1–9, <https://doi.org/10.1159/000512280>
- 108 Buck, M.D., Sowell, R.T., Kaech, S.M. and Pearce, E.L. (2017) Metabolic instruction of immunity. *Cell* **169**, 570–586, <https://doi.org/10.1016/j.cell.2017.04.004>
- 109 Husted, A.S., Trauelsen, M., Rudenko, O., Hjorth, S.A. and Schwartz, T.W. (2017) GPCR-mediated signaling of metabolites. *Cell Metab.* **25**, 777–796, <https://doi.org/10.1016/j.cmet.2017.03.008>
- 110 Tomas, L., Edsfieldt, A., Mollet, I.G. et al. (2018) Altered metabolism distinguishes high-risk from stable carotid atherosclerotic plaques. *Eur. Heart J.* **39**, 2301–2310, <https://doi.org/10.1093/eurheartj/ehy124>
- 111 Jung, S., Song, S.W., Lee, S. et al. (2018) Metabolic phenotyping of human atherosclerotic plaques: metabolic alterations and their biological relevance in plaque-containing aorta. *Atherosclerosis* **269**, 21–28, <https://doi.org/10.1016/j.atherosclerosis.2017.11.034>
- 112 Chen, W., Bural, G.G., Torigian, D.A., Rader, D.J. and Alavi, A. (2009) Emerging role of FDG-PET/CT in assessing atherosclerosis in large arteries. *Eur. J. Nucl. Med. Mol. Imaging* **36**, 144–151, <https://doi.org/10.1007/s00259-008-0947-2>
- 113 Yamashita, A., Zhao, Y., Matsuura, Y. et al. (2014) Increased metabolite levels of glycolysis and pentose phosphate pathway in rabbit atherosclerotic arteries and hypoxic macrophage. *PLoS ONE* **9**, e86426, <https://doi.org/10.1371/journal.pone.0086426>
- 114 Sarrazy, V., Viaud, M., Westerterp, M. et al. (2016) Disruption of Glut1 in hematopoietic stem cells prevents myelopoiesis and enhanced glucose flux in atheromatous plaques of ApoE(–/–) mice. *Circ. Res.* **118**, 1062–1077, <https://doi.org/10.1161/CIRCRESAHA.115.307599>
- 115 Wofford, J.A., Wieman, H.L., Jacobs, S.R., Zhao, Y. and Rathmell, J.C. (2008) IL-7 promotes Glut1 trafficking and glucose uptake via STAT5-mediated activation of Akt to support T-cell survival. *Blood* **111**, 2101–2111, <https://doi.org/10.1182/blood-2007-06-096297>
- 116 Rathmell, J.C., Vander Heiden, M.G., Harris, M.H., Frauwirth, K.A. and Thompson, C.B. (2000) In the absence of extrinsic signals, nutrient utilization by lymphocytes is insufficient to maintain either cell size or viability. *Mol. Cell* **6**, 683–692, [https://doi.org/10.1016/S1097-2765\(00\)00066-6](https://doi.org/10.1016/S1097-2765(00)00066-6)
- 117 Gaddis, D.E., Padgett, L.E., Wu, R. et al. (2021) Atherosclerosis impairs naive CD4 T-cell responses via disruption of glycolysis. *Arterioscler. Thromb. Vasc. Biol.* **41**, 2387–2398, <https://doi.org/10.1161/ATVBAHA.120.314189>
- 118 Shirai, T., Nazarewicz, R.R., Wallis, B.B. et al. (2016) The glycolytic enzyme PKM2 bridges metabolic and inflammatory dysfunction in coronary artery disease. *J. Exp. Med.* **213**, 337–354, <https://doi.org/10.1084/jem.20150900>
- 119 Lee, S.J., Thien Quach, C.H., Jung, K.H., Paik, J.Y., Lee, J.H., Park, J.W. et al. (2014) Oxidized low-density lipoprotein stimulates macrophage 18F-FDG uptake via hypoxia-inducible factor-1 $\alpha$  activation through Nox2-dependent reactive oxygen species generation. *J. Nucl. Med.* **55**, 1699–1705, <https://doi.org/10.2967/jnumed.114.139428>
- 120 Tawakol, A., Singh, P., Mojena, M. et al. (2015) HIF-1 $\alpha$  and PFKFB3 mediate a tight relationship between proinflammatory activation and anerobic metabolism in atherosclerotic macrophages. *Arterioscler. Thromb. Vasc. Biol.* **35**, 1463–1471, <https://doi.org/10.1161/ATVBAHA.115.305551>
- 121 Mosure, S.A. and Solt, L.A. (2021) Uncovering new challenges in targeting glycolysis to treat Th17 cell-mediated autoimmunity. *Immunometabolism* **3**, e210006, <https://doi.org/10.20900/immunometab20210006>
- 122 Lu, S., Deng, J., Liu, H. et al. (2018) PKM2-dependent metabolic reprogramming in CD4(+) T cells is crucial for hyperhomocysteinemia-accelerated atherosclerosis. *J. Mol. Med. (Berl.)* **96**, 585–600, <https://doi.org/10.1007/s00109-018-1645-6>
- 123 Nathan, D.M., Cleary, P.A., Backlund, J.Y. et al. (2005) Intensive diabetes treatment and cardiovascular disease in patients with type 1 diabetes. *N. Engl. J. Med.* **353**, 2643–2653, <https://doi.org/10.1056/NEJMoa052187>
- 124 Group, A.C., Patel, A., MacMahon, S. et al. (2008) Intensive blood glucose control and vascular outcomes in patients with type 2 diabetes. *N. Engl. J. Med.* **358**, 2560–2572, <https://doi.org/10.1056/NEJMoa0802987>
- 125 Kanter, J.E., Kramer, F., Barnhart, S. et al. (2012) Diabetes promotes an inflammatory macrophage phenotype and atherosclerosis through acyl-CoA synthetase 1. *Proc. Natl. Acad. Sci. U.S.A.* **109**, E715–E724, <https://doi.org/10.1073/pnas.1111600109>
- 126 Nagareddy, P.R., Murphy, A.J., Stirzaker, R.A. et al. (2013) Hyperglycemia promotes myelopoiesis and impairs the resolution of atherosclerosis. *Cell Metab.* **17**, 695–708, <https://doi.org/10.1016/j.cmet.2013.04.001>
- 127 Diabetes Control and Complications Trial/Epidemiology of Diabetes Interventions and Complications (DCCT/EDIC) Research Group (2016) Risk factors for cardiovascular disease in type 1 diabetes. *Diabetes* **65**, 1370–1379, <https://doi.org/10.2337/db15-1517>
- 128 Bornfeldt, K.E. (2016) Does elevated glucose promote atherosclerosis? Pros and cons. *Circ. Res.* **119**, 190–193, <https://doi.org/10.1161/CIRCRESAHA.116.308873>
- 129 Kalyani, R.R. (2021) Glucose-lowering drugs to reduce cardiovascular risk in type 2 diabetes. *N. Engl. J. Med.* **384**, 1248–1260, <https://doi.org/10.1056/NEJMcp2000280>
- 130 Goncalves, E. and Bell, D.S.H. (2018) Combination treatment of SGLT2 inhibitors and GLP-1 receptor agonists: symbiotic effects on metabolism and cardiorenal risk. *Diabetes Ther.* **9**, 919–926, <https://doi.org/10.1007/s13300-018-0420-6>
- 131 Leng, W., Ouyang, X., Lei, X. et al. (2016) The SGLT-2 inhibitor dapagliflozin has a therapeutic effect on atherosclerosis in diabetic ApoE(–/–) mice. *Mediators Inflamm.* **2016**, 6305735, <https://doi.org/10.1155/2016/6305735>

- 132 He, S., Kahles, F., Rattik, S. et al. (2019) Gut intraepithelial T cells calibrate metabolism and accelerate cardiovascular disease. *Nature* **566**, 115–119, <https://doi.org/10.1038/s41586-018-0849-9>
- 133 Netea, M.G., Dominguez-Andres, J., Barreiro, L.B. et al. (2020) Defining trained immunity and its role in health and disease. *Nat. Rev. Immunol.* **20**, 375–388, <https://doi.org/10.1038/s41577-020-0285-6>
- 134 Choudhury, R.P., Edgar, L., Ryden, M. and Fisher, E.A. (2021) Diabetes and metabolic drivers of trained immunity: new therapeutic targets beyond glucose. *Arterioscler. Thromb. Vasc. Biol.* **41**, 1284–1290, <https://doi.org/10.1161/ATVBAHA.120.314211>
- 135 Lim, G.B. (2021) Hyperglycaemia-induced trained immunity promotes atherosclerosis. *Nat. Rev. Cardiol.* **18**, 687, <https://doi.org/10.1038/s41569-021-00606-4>
- 136 Edgar, L., Akbar, N., Braithwaite, A.T. et al. (2021) Hyperglycaemia induces trained immunity in macrophages and their precursors and promotes atherosclerosis. *Circulation* **144**, 961–982, <https://doi.org/10.1161/CIRCULATIONAHA.120.046464>
- 137 Ketelhuth, D.F.J., Lutgens, E., Back, M. et al. (2019) Immunometabolism and atherosclerosis: perspectives and clinical significance: a position paper from the Working Group on Atherosclerosis and Vascular Biology of the European Society of Cardiology. *Cardiovasc. Res.* **115**, 1385–1392, <https://doi.org/10.1093/cvr/cvz166>
- 138 Christ, A., Gunther, P., Lauterbach, M.A.R. et al. (2018) Western diet triggers NLRP3-dependent innate immune reprogramming. *Cell* **172**, 162e14–175e14, <https://doi.org/10.1016/j.cell.2017.12.013>
- 139 Wang, Y., Wang, G.Z., Rabinovitch, P.S. and Tabas, I. (2014) Macrophage mitochondrial oxidative stress promotes atherosclerosis and nuclear factor-kappaB-mediated inflammation in macrophages. *Circ. Res.* **114**, 421–433, <https://doi.org/10.1161/CIRCRESAHA.114.302153>
- 140 Westerterp, M., Fotakis, P., Ouimet, M. et al. (2018) Cholesterol efflux pathways suppress inflammasome activation, NETosis, and atherogenesis. *Circulation* **138**, 898–912, <https://doi.org/10.1161/CIRCULATIONAHA.117.032636>
- 141 Yvan-Charvet, L., Welch, C., Pagler, T.A. et al. (2008) Increased inflammatory gene expression in ABC transporter-deficient macrophages: free cholesterol accumulation, increased signaling via toll-like receptors, and neutrophil infiltration of atherosclerotic lesions. *Circulation* **118**, 1837–1847, <https://doi.org/10.1161/CIRCULATIONAHA.108.793869>
- 142 Hong, C., Kidani, Y., A-Gonzalez, N. et al. (2012) Coordinate regulation of neutrophil homeostasis by liver X receptors in mice. *J. Clin. Invest.* **122**, 337–347, <https://doi.org/10.1172/JCI58393>
- 143 Thomas, D.G., Doran, A.C., Fotakis, P. et al. (2018) LXR suppresses inflammatory gene expression and neutrophil migration through cis-repression and cholesterol efflux. *Cell Rep.* **25**, 3774.e4–3785.e4, <https://doi.org/10.1016/j.celrep.2018.11.100>
- 144 Aguilar-Ballester, M., Herrero-Cervera, A., Vinue, A., Martinez-Hervas, S. and Gonzalez-Navarro, H. (2020) Impact of cholesterol metabolism in immune cell function and atherosclerosis. *Nutrients* **12**, 1–7, <https://doi.org/10.3390/nu12072021>
- 145 Bilotta, M.T., Petillo, S., Santoni, A. and Cipitelli, M. (2020) Liver X receptors: regulators of cholesterol metabolism, inflammation, autoimmunity, and cancer. *Front. Immunol.* **11**, 584303, <https://doi.org/10.3389/fimmu.2020.584303>
- 146 Cardoso, D. and Perucha, E. (2021) Cholesterol metabolism: a new molecular switch to control inflammation. *Clin. Sci. (Lond.)* **135**, 1389–1408, <https://doi.org/10.1042/CS20201394>
- 147 Lee, M.S. and Bensinger, S.J. (2022) Reprogramming cholesterol metabolism in macrophages and its role in host defense against cholesterol-dependent cytotoxins. *Cell. Mol. Immunol.* **19**, 327–336, <https://doi.org/10.1038/s41423-021-00827-0>
- 148 Van den Bossche, J., O'Neill, L.A. and Menon, D. (2017) Macrophage immunometabolism: where are we (going)? *Trends Immunol.* **38**, 395–406, <https://doi.org/10.1016/j.it.2017.03.001>
- 149 Feingold, K.R., Shigenaga, J.K., Kazemi, M.R. et al. (2012) Mechanisms of triglyceride accumulation in activated macrophages. *J. Leukoc. Biol.* **92**, 829–839, <https://doi.org/10.1189/jlb.1111537>
- 150 Ecker, J., Liebisch, G., Englmaier, M., Grandl, M., Robenek, H. and Schmitz, G. (2010) Induction of fatty acid synthesis is a key requirement for phagocytic differentiation of human monocytes. *Proc. Natl. Acad. Sci. U.S.A.* **107**, 7817–7822, <https://doi.org/10.1073/pnas.0912059107>
- 151 Schneider, J.G., Yang, Z., Chakravarthy, M.V., Lodhi, I.J., Wei, X., Turk, J. et al. (2010) Macrophage fatty-acid synthase deficiency decreases diet-induced atherosclerosis. *J. Biol. Chem.* **285**, 23398–23409, <https://doi.org/10.1074/jbc.M110.100321>
- 152 Bostrom, P., Magnusson, B., Svensson, P.A. et al. (2006) Hypoxia converts human macrophages into triglyceride-loaded foam cells. *Arterioscler. Thromb. Vasc. Biol.* **26**, 1871–1876, <https://doi.org/10.1161/01.ATV.0000229665.78997.0b>
- 153 Di Gioia, M., Spreafico, R., Springstead, J.R., Mendelson, M.M., Joehanes, R., Levy, D. et al. (2020) Endogenous oxidized phospholipids reprogram cellular metabolism and boost hyperinflammation. *Nat. Immunol.* **21**, 42–53, <https://doi.org/10.1038/s41590-019-0539-2>
- 154 Jaitin, D.A., Adlung, L., Thaïs, C.A. et al. (2019) Lipid-associated macrophages control metabolic homeostasis in a Trem2-dependent manner. *Cell* **178**, 686.e14–698.e14, <https://doi.org/10.1016/j.cell.2019.05.054>
- 155 Feng, X., Zhang, L., Xu, S. and Shen, A.Z. (2020) ATP-citrate lyase (ACLY) in lipid metabolism and atherosclerosis: An updated review. *Prog. Lipid Res.* **77**, 101006, <https://doi.org/10.1016/j.plipres.2019.101006>
- 156 Baardman, J., Verberk, S.G.S., van der Velden, S. et al. (2020) Macrophage ATP citrate lyase deficiency stabilizes atherosclerotic plaques. *Nat. Commun.* **11**, 6296, <https://doi.org/10.1038/s41467-020-20141-z>
- 157 Nikolic, D., Mikhailidis, D.P., Davidson, M.H., Rizzo, M. and Banach, M. (2014) ETC-1002: a future option for lipid disorders? *Atherosclerosis* **237**, 705–710, <https://doi.org/10.1016/j.atherosclerosis.2014.10.099>
- 158 Howie, D., Cobbold, S.P., Adams, E. et al. (2017) Foxp3 drives oxidative phosphorylation and protection from lipotoxicity. *JCI Insight* **2**, e89160, <https://doi.org/10.1172/jci.insight.89160>
- 159 Angelin, A., Gil-de-Gomez, L., Dahiya, S. et al. (2017) Foxp3 eepograms T cell metabolism to function in low-glucose, high-lactate environments. *Cell Metab.* **25**, 1282.e7–1293.e7, <https://doi.org/10.1016/j.cmet.2016.12.018>
- 160 Janes, P.W., Ley, S.C., Magee, A.I. and Kabouridis, P.S. (2000) The role of lipid rafts in T cell antigen receptor (TCR) signalling. *Semin. Immunol.* **12**, 23–34, <https://doi.org/10.1006/smim.2000.0204>

- 161 Bietz, A., Zhu, H., Xue, M. and Xu, C. (2017) Cholesterol metabolism in T cells. *Front. Immunol.* **8**, 1664, <https://doi.org/10.3389/fimmu.2017.01664>
- 162 Mor, A., Planer, D., Luboshits, G. et al. (2007) Role of naturally occurring CD4+ CD25+ regulatory T cells in experimental atherosclerosis. *Arterioscler. Thromb. Vasc. Biol.* **27**, 893–900, <https://doi.org/10.1161/01.ATV.0000259365.31469.89>
- 163 Gaddis, D.E., Padgett, L.E., Wu, R. et al. (2018) Apolipoprotein AI prevents regulatory to follicular helper T cell switching during atherosclerosis. *Nat. Commun.* **9**, 1095, <https://doi.org/10.1038/s41467-018-03493-5>
- 164 Kempkes, R.W.M., Joosten, I., Koenen, H. and He, X. (2019) Metabolic pathways involved in regulatory T cell functionality. *Front. Immunol.* **10**, 2839, <https://doi.org/10.3389/fimmu.2019.02839>
- 165 Wang, X.P., Zhang, W., Liu, X.Q. et al. (2014) Arginase I enhances atherosclerotic plaque stabilization by inhibiting inflammation and promoting smooth muscle cell proliferation. *Eur. Heart J.* **35**, 911–919, <https://doi.org/10.1093/eurheartj/ehz329>
- 166 Li, B., Lu, X., Wang, J., He, X., Gu, Q., Wang, L. et al. (2018) The metabolomics study of P-selectin glycoprotein ligand-1 (PSGL-1) deficiency inhibiting the progression of atherosclerosis in LDLR(-/-) mice. *Int. J. Biol. Sci.* **14**, 36–46, <https://doi.org/10.7150/ijbs.23082>
- 167 Rom, O., Grajeda-Iglesias, C., Najjar, M. et al. (2017) Atherogenicity of amino acids in the lipid-laden macrophage model system in vitro and in atherosclerotic mice: a key role for triglyceride metabolism. *J. Nutr. Biochem.* **45**, 24–38, <https://doi.org/10.1016/j.jnutbio.2017.02.023>
- 168 Arts, R.J., Novakovic, B., Ter Horst, R. et al. (2016) Glutaminolysis and fumarate accumulation integrate immunometabolic and epigenetic programs in trained immunity. *Cell Metab.* **24**, 807–819, <https://doi.org/10.1016/j.cmet.2016.10.008>
- 169 Petrus, P., Lecoutre, S., Dollet, L. et al. (2020) Glutamine links obesity to inflammation in human white adipose tissue. *Cell Metab.* **31**, 375e11–390e11, <https://doi.org/10.1016/j.cmet.2019.11.019>
- 170 Mak, T.W., Grusdat, M., Duncan, G.S. et al. (2017) Glutathione primes T cell metabolism for inflammation. *Immunity* **46**, 1089–1090, <https://doi.org/10.1016/j.immuni.2017.06.009>
- 171 Hartmann, R., Licks, F., Schemitt, E.G. et al. (2017) Effect of glutamine on liver injuries induced by intestinal ischemia-reperfusion in rats. *Nutr. Hosp.* **34**, 548–554, <https://doi.org/10.20960/nh.643>
- 172 Eelen, G., Dubois, C., Cantelmo, A.R. et al. (2018) Role of glutamine synthetase in angiogenesis beyond glutamine synthesis. *Nature* **561**, 63–69, <https://doi.org/10.1038/s41586-018-0466-7>
- 173 Napoli, C., de Nigris, F., Williams-Ignarro, S., Pignalosa, O., Sica, V. and Ignarro, L.J. (2006) Nitric oxide and atherosclerosis: an update. *Nitric Oxide* **15**, 265–279, <https://doi.org/10.1016/j.niox.2006.03.011>
- 174 Tousoulis, D., Boger, R.H., Antoniadou, C., Siasos, G., Stefanadi, E. and Stefanadis, C. (2007) Mechanisms of disease: L- arginine in coronary atherosclerosis—a clinical perspective. *Nat. Clin. Pract. Cardiovasc. Med.* **4**, 274–283, <https://doi.org/10.1038/npcardio0878>
- 175 Hong, F.F., Liang, X.Y., Liu, W., Lv, S., He, S.J., Kuang, H.B. et al. (2019) Roles of eNOS in atherosclerosis treatment. *Inflamm. Res.* **68**, 429–441, <https://doi.org/10.1007/s00011-019-01229-9>
- 176 Munder, M. (2009) Arginase: an emerging key player in the mammalian immune system. *Br. J. Pharmacol.* **158**, 638–651, <https://doi.org/10.1111/j.1476-5381.2009.00291.x>
- 177 Pourcet, B. and Pineda-Torra, I. (2013) Transcriptional regulation of macrophage arginase 1 expression and its role in atherosclerosis. *Trends Cardiovasc. Med.* **23**, 143–152, <https://doi.org/10.1016/j.tcm.2012.10.003>
- 178 Polyzos, K.A., Ovchinnikova, O., Berg, M. et al. (2015) Inhibition of indoleamine 2,3-dioxygenase promotes vascular inflammation and increases atherosclerosis in ApoE-/- mice. *Cardiovasc. Res.* **106**, 295–302, <https://doi.org/10.1093/cvr/cvv100>
- 179 Cole, J.E., Astola, N., Cribbs, A.P. et al. (2015) Indoleamine 2,3-dioxygenase-1 is protective in atherosclerosis and its metabolites provide new opportunities for drug development. *Proc. Natl. Acad. Sci. U.S.A.* **112**, 13033–13038, <https://doi.org/10.1073/pnas.1517820112>
- 180 Forteza, M.J., Polyzos, K.A., Baumgartner, R. et al. (2018) Activation of the regulatory T-cell/indoleamine 2,3-dioxygenase axis reduces vascular inflammation and atherosclerosis in hyperlipidemic mice. *Front. Immunol.* **9**, 950, <https://doi.org/10.3389/fimmu.2018.00950>
- 181 Yun, T.J., Lee, J.S., Machmach, K. et al. (2016) Indoleamine 2,3-dioxygenase-expressing aortic plasmacytoid dendritic cells protect against atherosclerosis by induction of regulatory T cells. *Cell Metab.* **24**, 886, <https://doi.org/10.1016/j.cmet.2016.11.008>
- 182 Nakajima, K., Yamashita, T., Kita, T. et al. (2011) Orally administered eicosapentaenoic acid induces rapid regression of atherosclerosis via modulating the phenotype of dendritic cells in LDL receptor- deficient mice. *Arterioscler. Thromb. Vasc. Biol.* **31**, 1963–1972, <https://doi.org/10.1161/ATVBAHA.111.229443>
- 183 Klingenberg, R., Gerdes, N., Badeau, R.M. et al. (2013) Depletion of FOXP3+ regulatory T cells promotes hypercholesterolemia and atherosclerosis. *J. Clin. Invest.* **123**, 1323–1334, <https://doi.org/10.1172/JCI63891>
- 184 Mbongue, J.C., Nicholas, D.A., Torrez, T.W., Kim, N.S., Firek, A.F. and Langridge, W.H. (2015) The role of indoleamine 2, 3-dioxygenase in immune suppression and autoimmunity. *Vaccines (Basel)* **3**, 703–729, <https://doi.org/10.3390/vaccines3030703>
- 185 Baumgartner, R., Berg, M., Matic, L. et al. (2020) Evidence that a deviation in the kynurenine pathway aggravates atherosclerotic disease in humans. *J. Intern. Med.* **289**, 53–68
- 186 Metghalchi, S., Ponnuswamy, P., Simon, T. et al. (2015) Indoleamine 2,3-dioxygenase fine-tunes immune homeostasis in atherosclerosis and colitis through repression of interleukin-10 production. *Cell Metab.* **22**, 460–471, <https://doi.org/10.1016/j.cmet.2015.07.004>
- 187 Melhem, N.J., Chajadine, M., Gomez, I. et al. (2021) Endothelial cell indoleamine 2,3-dioxygenase 1 alters cardiac function after myocardial infarction through kynurenine. *Circulation* **143**, 566–580, <https://doi.org/10.1161/CIRCULATIONAHA.120.050301>
- 188 Li, X., Sun, X. and Carmeliet, P. (2019) Hallmarks of endothelial cell metabolism in health and disease. *Cell Metab.* **30**, 414–433, <https://doi.org/10.1016/j.cmet.2019.08.011>
- 189 Kluge, M.A., Fetterman, J.L. and Vita, J.A. (2013) Mitochondria and endothelial function. *Circ. Res.* **112**, 1171–1188, <https://doi.org/10.1161/CIRCRESAHA.111.300233>
- 190 Shenouda, S.M., Widlansky, M.E., Chen, K. et al. (2011) Altered mitochondrial dynamics contributes to endothelial dysfunction in diabetes mellitus. *Circulation* **124**, 444–453, <https://doi.org/10.1161/CIRCULATIONAHA.110.014506>

- 191 Du, X., Edelstein, D., Obici, S., Higham, N., Zou, M.H. and Brownlee, M. (2006) Insulin resistance reduces arterial prostacyclin synthase and eNOS activities by increasing endothelial fatty acid oxidation. *J. Clin. Invest.* **116**, 1071–1080, <https://doi.org/10.1172/JCI23354>
- 192 Ballinger, S.W., Patterson, C., Yan, C.N. et al. (2000) Hydrogen peroxide- and peroxynitrite-induced mitochondrial DNA damage and dysfunction in vascular endothelial and smooth muscle cells. *Circ. Res.* **86**, 960–966, <https://doi.org/10.1161/01.RES.86.9.960>
- 193 Mercer, J.R., Cheng, K.K., Figg, N. et al. (2010) DNA damage links mitochondrial dysfunction to atherosclerosis and the metabolic syndrome. *Circ. Res.* **107**, 1021–1031, <https://doi.org/10.1161/CIRCRESAHA.110.218966>
- 194 Shemiakova, T., Ivanova, E., Grechko, A.V., Gerasimova, E.V., Sobenin, I.A. and Orekhov, A.N. (2020) Mitochondrial dysfunction and DNA damage in the context of pathogenesis of atherosclerosis. *Biomedicines* **8**, 166–168, <https://doi.org/10.3390/biomedicines8060166>
- 195 El-Osta, A., Brasacchio, D., Yao, D. et al. (2008) Transient high glucose causes persistent epigenetic changes and altered gene expression during subsequent normoglycemia. *J. Exp. Med.* **205**, 2409–2417, <https://doi.org/10.1084/jem.20081188>
- 196 Prattichizzo, F., Giuliani, A., Ceka, A. et al. (2015) Epigenetic mechanisms of endothelial dysfunction in type 2 diabetes. *Clin. Epigenetics* **7**, 56, <https://doi.org/10.1186/s13148-015-0090-4>
- 197 Allahverdian, S., Chaabane, C., Boukais, K., Francis, G.A. and Bochaton-Piallat, M.L. (2018) Smooth muscle cell fate and plasticity in atherosclerosis. *Cardiovasc. Res.* **114**, 540–550, <https://doi.org/10.1093/cvr/cvy022>
- 198 Wang, J., Uryga, A.K., Reinhold, J. et al. (2015) Vascular smooth muscle cell senescence promotes atherosclerosis and features of plaque vulnerability. *Circulation* **132**, 1909–1919, <https://doi.org/10.1161/CIRCULATIONAHA.115.016457>
- 199 Shi, J., Yang, Y., Cheng, A., Xu, G. and He, F. (2020) Metabolism of vascular smooth muscle cells in vascular diseases. *Am. J. Physiol. Heart Circ. Physiol.* **319**, H613–H631, <https://doi.org/10.1152/ajpheart.00220.2020>
- 200 Liu, K., Fang, C., Shen, Y., Liu, Z., Zhang, M., Ma, B. et al. (2017) Hypoxia-inducible factor 1 $\alpha$  induces phenotype switch of human aortic vascular smooth muscle cell through PI3K/AKT/AEG-1 signaling. *Oncotarget* **8**, 33343–33352, <https://doi.org/10.18632/oncotarget.16448>
- 201 Yang, L., Gao, L., Nickel, T. et al. (2017) Lactate promotes synthetic phenotype in vascular smooth muscle cells. *Circ. Res.* **121**, 1251–1262, <https://doi.org/10.1161/CIRCRESAHA.117.311819>
- 202 Zhang, C.Y., Hu, Y.C., Zhang, Y. et al. (2021) Glutamine switches vascular smooth muscle cells to synthetic phenotype through inhibiting miR-143 expression and upregulating THY1 expression. *Life Sci.* **277**, 119365, <https://doi.org/10.1016/j.lfs.2021.119365>
- 203 Newman, A.A.C., Serbulea, V., Baylis, R.A. et al. (2021) Multiple cell types contribute to the atherosclerotic lesion fibrous cap by PDGFR $\beta$  and bioenergetic mechanisms. *Nat. Metab.* **3**, 166–181, <https://doi.org/10.1038/s42255-020-00338-8>
- 204 Gilmore, I.S., Heiles, S. and Pieterse, C.L. (2019) Metabolic imaging at the single-cell scale: recent advances in mass spectrometry imaging. *Annu. Rev. Anal. Chem.* **12**, 201–224, <https://doi.org/10.1146/annurev-anchem-061318-115516>
- 205 Scupakova, K., Balluff, B., Tressler, C., Adelaja, T., Heeren, R.M.A., Glunde, K. et al. (2020) Cellular resolution in clinical MALDI mass spectrometry imaging: the latest advancements and current challenges. *Clin. Chem. Lab. Med.* **58**, 914–929, <https://doi.org/10.1515/cclm-2019-0858>
- 206 Artyomov, M.N. and Van den Bossche, J. (2020) Immunometabolism in the single-cell era. *Cell Metab.* **32**, 710–725, <https://doi.org/10.1016/j.cmet.2020.09.013>
